# Supplementary material for: Regulation of NH-tautomerism in N-confused porphyrin by N-alkylation
Source: Royal Society of Chemistry journal article supplement (doi:10.1039/c2ob25351h), 2012-01-01
Supplement: c2ob25351h.pdf [file c2ob25351h.pdf]

**Supporting Information**  
**for**  
**Regulation of NH-Tautomerism in N-Confused Porphyrin by**  
**N-Alkylation**

*Motoki Toganoh, Takaaki Yamamoto, Takayoshi Hihara, Hisanori Akimaru and  
Hiroyuki Furuta\**

Department of Chemistry and Biochemistry, Graduate School of Engineering,  
Kyushu University, 744 Moto-oka, Nishi-ku, Fukuoka 819-0395, Japan

International Research Center for Molecular Systems, Kyushu University, 744 Moto-oka,  
Nishi-ku, Fukuoka 819-0395, Japan.

*E-mail: hfuruta@cstf.kyushu-u.ac.jp*

**Calculation Details**

All density functional theory calculations<sup>1</sup> were achieved with a Gaussian09 program package.<sup>2</sup> The basis sets implemented in the program were used. The B3LYP density functional method<sup>3</sup> was used with the 6-31G\*\* basis set for structural optimizations and the 6-311++G\*\* basis set was used for nucleus-independent chemical shift (NICS) calculations. Equilibrium geometries were fully optimized and verified by the frequency calculations, where no imaginary frequency was found. The NICS values were calculated with the gauge invariant atomic orbitals (GIAO) method for the optimized structures.

[1] (a) Hohenberg, P.; Kohn, W. *Phys. Rev.* **1964**, *136*, B864. (b) Kohn, W.; Sham, L. J. *Phys. Rev.* **1965**, *140*, A1133.

[2] Gaussian 09, Revision B.01, M. J. Frisch, G. W. Trucks, H. B. Schlegel, G. E. Scuseria, M. A. Robb, J. R. Cheeseman, G. Scalmani, V. Barone, B. Mennucci, G. A. Petersson, H. Nakatsuji, M. Caricato, X. Li, H. P. Hratchian, A. F. Izmaylov, J. Bloino, G. Zheng, J. L. Sonnenberg, M. Hada, M. Ehara, K. Toyota, R. Fukuda, J. Hasegawa, M. Ishida, T. Nakajima, Y. Honda, O. Kitao, H. Nakai, T. Vreven, J. A. Montgomery, Jr., J. E. Peralta, F. Ogliaro, M. Bearpark, J. J. Heyd, E. Brothers, K. N. Kudin, V. N. Staroverov, T. Keith, R. Kobayashi, J. Normand, K. Raghavachari, A. Rendell, J. C. Burant, S. S. Iyengar, J. Tomasi, M. Cossi, N. Rega, J. M. Millam, M. Klene, J. E. Knox, J. B. Cross, V. Bakken, C. Adamo, J. Jaramillo, R. Gomperts, R. E. Stratmann, O. Yazyev, A. J. Austin, R. Cammi, C. Pomelli, J. W. Ochterski, R. L. Martin, K. Morokuma, V. G. Zakrzewski, G. A. Voth, P. Salvador, J. J. Dannenberg, S. Dapprich, A. D. Daniels, O. Farkas, J. B. Foresman, J. V. Ortiz, J. Cioslowski and D. J. Fox, Gaussian, Inc., Wallingford CT, 2010.

[3] (a) Becke, A. D. *J. Phys. Chem.* **1993**, *98*, 5648. (b) Lee, C.; Yang, W.; Parr, R. G. *Phys. Rev. B* **1988**, *37*, 785. (c) Vosko, S. H.; Wilk, L.; Nusair, M. *Can. J. Phys.* **1980**, *58*, 1200. (d) Stephens, P. J.; Devlin, F. J.; Chabalowski, C. F.; Frisch, M. J. *J. Phys. Chem.* **1994**, *98*, 11623.

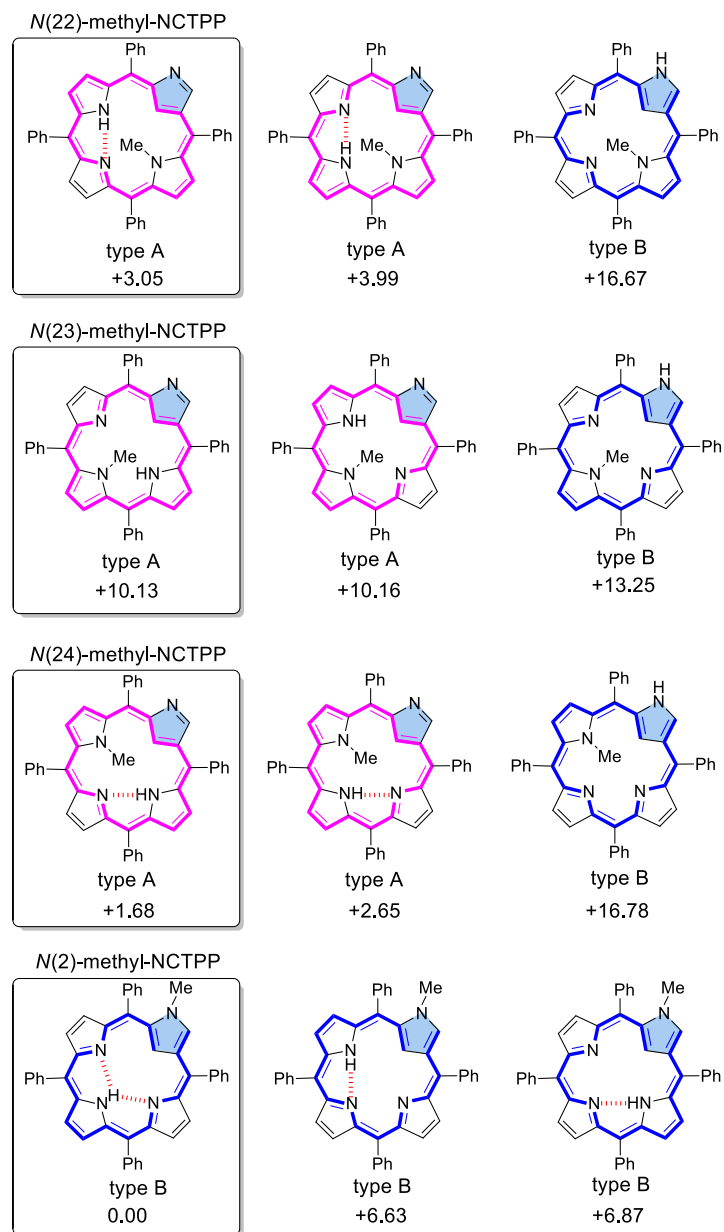

**Figure S1.** Structures of *N*-methyl-NCTPP isomers and NH-tautomers.

## Cartesian coordinates and vibrational frequencies for the optimized structures

### *N*(22)-*Me*-*N*(24)-*H*-NCTPP

E(RB3LYP) = -1953.07408865 A.U.

Stoichiometry C<sub>45</sub>H<sub>32</sub>N<sub>4</sub>  
 Framework group C1[X(C<sub>45</sub>H<sub>32</sub>N<sub>4</sub>)]  
 Deg. of freedom 237  
 Full point group C1  
 Largest Abelian subgroup C1 NOp 1  
 Largest concise Abelian subgroup C1 NOp 1

Standard orientation:

| Center Number | Atomic Number | Atomic Type | Coordinates (Angstroms) |           |           |
|---------------|---------------|-------------|-------------------------|-----------|-----------|
|               |               |             | X                       | Y         | Z         |
| 1             | 1             | 0           | 0.774956                | 0.921862  | 0.110847  |
| 2             | 7             | 0           | -2.978121               | 2.877072  | 0.518278  |
| 3             | 7             | 0           | -1.294540               | -1.850464 | 0.445940  |
| 4             | 7             | 0           | 1.741198                | -1.031921 | 0.089691  |
| 5             | 7             | 0           | 1.247545                | 1.798734  | -0.074992 |
| 6             | 6             | 0           | -1.710466               | 2.460757  | 0.023188  |
| 7             | 6             | 0           | -1.709678               | 1.076488  | -0.218948 |
| 8             | 6             | 0           | -3.709041               | 1.800903  | 0.569604  |
| 9             | 6             | 0           | -2.990982               | 0.600775  | 0.122570  |
| 10            | 6             | 0           | -3.488322               | -0.724813 | 0.055079  |
| 11            | 6             | 0           | -2.608343               | -1.830772 | -0.034907 |
| 12            | 6             | 0           | -2.798495               | -3.027881 | -0.779296 |
| 13            | 6             | 0           | -1.609760               | -3.721222 | -0.786581 |
| 14            | 6             | 0           | -0.651107               | -2.979152 | -0.034858 |
| 15            | 6             | 0           | 0.719545                | -3.306765 | 0.137749  |
| 16            | 6             | 0           | 1.784226                | -2.385119 | 0.298906  |
| 17            | 6             | 0           | 3.149101                | -2.804807 | 0.624957  |
| 18            | 6             | 0           | 3.922590                | -1.695558 | 0.561865  |
| 19            | 6             | 0           | 3.032197                | -0.594552 | 0.202136  |
| 20            | 6             | 0           | 3.474223                | 0.731749  | -0.011627 |
| 21            | 6             | 0           | 2.615045                | 1.836152  | -0.199750 |
| 22            | 6             | 0           | 2.954804                | 3.188779  | -0.519093 |
| 23            | 6             | 0           | 1.794715                | 3.923002  | -0.548716 |
| 24            | 6             | 0           | 0.694353                | 3.056227  | -0.248665 |
| 25            | 6             | 0           | -0.666735               | 3.408810  | -0.114162 |
| 26            | 6             | 0           | -4.942971               | -0.979924 | -0.027564 |
| 27            | 6             | 0           | -5.523520               | -2.078506 | 0.636794  |
| 28            | 6             | 0           | -6.893342               | -2.318655 | 0.561713  |
| 29            | 6             | 0           | -7.716719               | -1.467473 | -0.178172 |
| 30            | 6             | 0           | -7.157561               | -0.376037 | -0.846186 |
| 31            | 6             | 0           | -5.787542               | -0.135296 | -0.774991 |
| 32            | 6             | 0           | 1.047058                | -4.755821 | -0.002991 |
| 33            | 6             | 0           | 0.365425                | -5.720198 | 0.761664  |
| 34            | 6             | 0           | 0.654029                | -7.077397 | 0.629936  |
| 35            | 6             | 0           | 1.625461                | -7.503382 | -0.277862 |
| 36            | 6             | 0           | 2.303365                | -6.561012 | -1.053310 |
| 37            | 6             | 0           | 2.017279                | -5.203288 | -0.918625 |
| 38            | 6             | 0           | 4.942638                | 1.003616  | -0.043626 |
| 39            | 6             | 0           | 5.769364                | 0.373607  | -0.989293 |
| 40            | 6             | 0           | 7.140357                | 0.626892  | -1.022488 |
| 41            | 6             | 0           | 7.713120                | 1.514996  | -0.110529 |
| 42            | 6             | 0           | 6.904695                | 2.148242  | 0.834947  |
| 43            | 6             | 0           | 5.533458                | 1.895842  | 0.867297  |
| 44            | 6             | 0           | -1.010027               | 4.856230  | -0.074007 |
| 45            | 6             | 0           | -0.335627               | 5.744373  | 0.781567  |
| 46            | 6             | 0           | -0.663938               | 7.099320  | 0.809267  |
| 47            | 6             | 0           | -1.671239               | 7.593412  | -0.020006 |
| 48            | 6             | 0           | -2.355227               | 6.720721  | -0.869215 |
| 49            | 6             | 0           | -2.033717               | 5.366370  | -0.891161 |
| 50            | 6             | 0           | -0.886904               | -1.195161 | 1.692188  |
| 51            | 1             | 0           | -0.934623               | 0.485118  | -0.682580 |
| 52            | 1             | 0           | -4.720166               | 1.821262  | 0.963245  |
| 53            | 1             | 0           | -3.695722               | -3.261140 | -1.333730 |
| 54            | 1             | 0           | -1.382916               | -4.621911 | -1.337040 |
| 55            | 1             | 0           | 3.453334                | -3.806969 | 0.888670  |
| 56            | 1             | 0           | 4.980834                | -1.613384 | 0.761622  |
| 57            | 1             | 0           | 3.956283                | 3.542141  | -0.710221 |
| 58            | 1             | 0           | 1.695949                | 4.972967  | -0.776339 |
| 59            | 1             | 0           | -4.891620               | -2.729705 | 1.231867  |
| 60            | 1             | 0           | -7.320421               | -3.166025 | 1.090197  |
| 61            | 1             | 0           | -8.785005               | -1.654174 | -0.235354 |
| 62            | 1             | 0           | -7.788544               | 0.283773  | -1.434472 |
| 63            | 1             | 0           | -5.354578               | 0.695859  | -1.321397 |
| 64            | 1             | 0           | -0.386197               | -5.394070 | 1.473916  |

*N*(22)-*Me*-*N*(24)-*H*-NCTPP

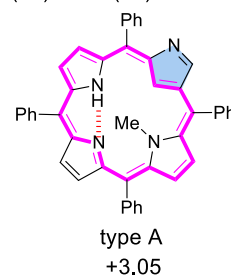

|    |   |   |           |           |           |
|----|---|---|-----------|-----------|-----------|
| 65 | 1 | 0 | 0.122645  | -7.802309 | 1.239877  |
| 66 | 1 | 0 | 1.849383  | -8.560900 | -0.382865 |
| 67 | 1 | 0 | 3.050809  | -6.883603 | -1.772457 |
| 68 | 1 | 0 | 2.533835  | -4.476710 | -1.537092 |
| 69 | 1 | 0 | 5.325037  | -0.309633 | -1.706300 |
| 70 | 1 | 0 | 7.760395  | 0.133866  | -1.765735 |
| 71 | 1 | 0 | 8.780878  | 1.711865  | -0.136199 |
| 72 | 1 | 0 | 7.342322  | 2.835258  | 1.553607  |
| 73 | 1 | 0 | 4.910485  | 2.380459  | 1.612814  |
| 74 | 1 | 0 | 0.432264  | 5.361384  | 1.445845  |
| 75 | 1 | 0 | -0.137544 | 7.766420  | 1.485910  |
| 76 | 1 | 0 | -1.926461 | 8.649020  | -0.000454 |
| 77 | 1 | 0 | -3.143570 | 7.096225  | -1.515182 |
| 78 | 1 | 0 | -2.570112 | 4.690616  | -1.547528 |
| 79 | 1 | 0 | -0.086515 | -0.477572 | 1.523487  |
| 80 | 1 | 0 | -0.523511 | -1.957848 | 2.386146  |
| 81 | 1 | 0 | -1.749211 | -0.692903 | 2.125675  |

-----  
Harmonic frequencies (cm<sup>-1</sup>), IR intensities (KM/Mole), Raman scattering activities (A<sup>4</sup>/AMU), depolarization ratios for plane and unpolarized incident light, reduced masses (AMU), force constants (mDyne/A), and normal coordinates:

|                | 1       | 2       | 3       |
|----------------|---------|---------|---------|
|                | A       | A       | A       |
| Frequencies -- | 13.9798 | 28.1921 | 31.6162 |
| Red. masses -- | 6.1055  | 5.4792  | 3.9904  |
| Frc consts --  | 0.0007  | 0.0026  | 0.0024  |
| IR Inten --    | 0.0084  | 0.3994  | 0.0390  |

**N(22)-Me-N(23)-H-NCTPP**

E(RB3LYP) = -1953.07258796 A.U.

Stoichiometry C45H32N4  
 Framework group C1[X(C45H32N4)]  
 Deg. of freedom 237  
 Full point group C1 NOp 1  
 Largest Abelian subgroup C1 NOp 1  
 Largest concise Abelian subgroup C1 NOp 1

Standard orientation:

| Center Number | Atomic Number | Atomic Type | Coordinates (Angstroms) |           |           |
|---------------|---------------|-------------|-------------------------|-----------|-----------|
|               |               |             | X                       | Y         | Z         |
| 1             | 7             | 0           | -2.994932               | 2.864033  | 0.518974  |
| 2             | 7             | 0           | -1.284213               | -1.853751 | 0.446636  |
| 3             | 7             | 0           | 1.746771                | -1.017777 | 0.090387  |
| 4             | 1             | 0           | 0.877511                | -0.429741 | -0.118179 |
| 5             | 7             | 0           | 1.236861                | 1.809995  | -0.074296 |
| 6             | 6             | 0           | -1.724906               | 2.455009  | 0.023884  |
| 7             | 6             | 0           | -1.716163               | 1.070768  | -0.218252 |
| 8             | 6             | 0           | -3.719656               | 1.783682  | 0.570300  |
| 9             | 6             | 0           | -2.994713               | 0.587700  | 0.123266  |
| 10            | 6             | 0           | -3.484427               | -0.740724 | 0.055775  |
| 11            | 6             | 0           | -2.598108               | -1.841608 | -0.034211 |
| 12            | 6             | 0           | -2.781378               | -3.039790 | -0.778600 |
| 13            | 6             | 0           | -1.588678               | -3.726289 | -0.785885 |
| 14            | 6             | 0           | -0.634305               | -2.978723 | -0.034162 |
| 15            | 6             | 0           | 0.738207                | -3.298454 | 0.138445  |
| 16            | 6             | 0           | 1.797574                | -2.370705 | 0.299602  |
| 17            | 6             | 0           | 3.164838                | -2.782543 | 0.625653  |
| 18            | 6             | 0           | 3.931941                | -1.668868 | 0.562561  |
| 19            | 6             | 0           | 3.035236                | -0.572997 | 0.202832  |
| 20            | 6             | 0           | 3.469633                | 0.755822  | -0.010931 |
| 21            | 6             | 0           | 2.604123                | 1.855270  | -0.199054 |
| 22            | 6             | 0           | 2.936104                | 3.209827  | -0.518397 |
| 23            | 6             | 0           | 1.771815                | 3.937372  | -0.548020 |
| 24            | 6             | 0           | 0.676452                | 3.064288  | -0.247969 |
| 25            | 6             | 0           | -0.686640               | 3.409044  | -0.113466 |
| 26            | 6             | 0           | -4.937586               | -1.004190 | -0.026868 |
| 27            | 6             | 0           | -5.511813               | -2.106090 | 0.637490  |
| 28            | 6             | 0           | -6.880232               | -2.354106 | 0.562409  |
| 29            | 6             | 0           | -7.708487               | -1.507670 | -0.177476 |
| 30            | 6             | 0           | -7.155610               | -0.413038 | -0.845490 |
| 31            | 6             | 0           | -5.786997               | -0.164429 | -0.774295 |
| 32            | 6             | 0           | 1.074041                | -4.745604 | -0.002295 |
| 33            | 6             | 0           | 0.397961                | -5.713882 | 0.762360  |
| 34            | 6             | 0           | 0.694359                | -7.069400 | 0.630632  |
| 35            | 6             | 0           | 1.668223                | -7.489796 | -0.277166 |
| 36            | 6             | 0           | 2.340701                | -6.543546 | -1.052614 |
| 37            | 6             | 0           | 2.046817                | -5.187489 | -0.917929 |
| 38            | 6             | 0           | 4.936462                | 1.036123  | -0.042930 |
| 39            | 6             | 0           | 5.766794                | 0.410875  | -0.988597 |
| 40            | 6             | 0           | 7.136309                | 0.672034  | -1.021792 |
| 41            | 6             | 0           | 7.703959                | 1.563414  | -0.109833 |
| 42            | 6             | 0           | 6.891909                | 2.192004  | 0.835643  |
| 43            | 6             | 0           | 5.522145                | 1.931729  | 0.867993  |
| 44            | 6             | 0           | -1.038243               | 4.854468  | -0.073311 |
| 45            | 6             | 0           | -0.368958               | 5.746471  | 0.782263  |
| 46            | 6             | 0           | -0.705050               | 7.099509  | 0.809963  |
| 47            | 6             | 0           | -1.715173               | 7.587805  | -0.019310 |
| 48            | 6             | 0           | -2.394135               | 6.711198  | -0.868519 |
| 49            | 6             | 0           | -2.064848               | 5.358717  | -0.890465 |
| 50            | 6             | 0           | -0.880349               | -1.196116 | 1.692884  |
| 51            | 1             | 0           | -0.937723               | 0.483861  | -0.681884 |
| 52            | 1             | 0           | -4.730881               | 1.798230  | 0.963941  |
| 53            | 1             | 0           | -3.677249               | -3.278201 | -1.333034 |
| 54            | 1             | 0           | -1.356662               | -4.625660 | -1.336344 |
| 55            | 1             | 0           | 3.474825                | -3.782941 | 0.889366  |
| 56            | 1             | 0           | 4.989695                | -1.580614 | 0.762318  |
| 57            | 1             | 0           | 3.935536                | 3.568938  | -0.709525 |
| 58            | 1             | 0           | 1.667017                | 4.986752  | -0.775643 |
| 59            | 1             | 0           | -4.876181               | -2.753647 | 1.232563  |
| 60            | 1             | 0           | -7.302435               | -3.203916 | 1.090893  |
| 61            | 1             | 0           | -8.775682               | -1.700506 | -0.234658 |
| 62            | 1             | 0           | -7.790374               | 0.243135  | -1.433776 |
| 63            | 1             | 0           | -5.358816               | 0.669200  | -1.320701 |
| 64            | 1             | 0           | -0.355523               | -5.392078 | 1.474612  |
| 65            | 1             | 0           | 0.167149                | -7.797354 | 1.240573  |
| 66            | 1             | 0           | 1.898218                | -8.546010 | -0.382169 |

N(22)-Me-N(23)-H-NCTPP

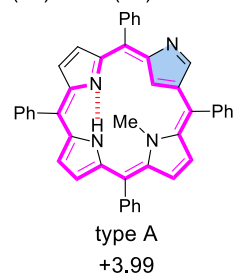

|    |   |   |           |           |           |
|----|---|---|-----------|-----------|-----------|
| 67 | 1 | 0 | 3.089986  | -6.861837 | -1.771761 |
| 68 | 1 | 0 | 2.559190  | -4.457954 | -1.536396 |
| 69 | 1 | 0 | 5.326401  | -0.274907 | -1.705604 |
| 70 | 1 | 0 | 7.759170  | 0.182579  | -1.765039 |
| 71 | 1 | 0 | 8.770568  | 1.766416  | -0.135503 |
| 72 | 1 | 0 | 7.325581  | 2.881524  | 1.554303  |
| 73 | 1 | 0 | 4.896397  | 2.412758  | 1.613510  |
| 74 | 1 | 0 | 0.401121  | 5.367901  | 1.446541  |
| 75 | 1 | 0 | -0.182498 | 7.769623  | 1.486606  |
| 76 | 1 | 0 | -1.976457 | 8.641929  | 0.000242  |
| 77 | 1 | 0 | -3.184623 | 7.082166  | -1.514486 |
| 78 | 1 | 0 | -2.597351 | 4.679892  | -1.546832 |
| 79 | 1 | 0 | -0.084097 | -0.473940 | 1.524183  |
| 80 | 1 | 0 | -0.512580 | -1.956702 | 2.386842  |
| 81 | 1 | 0 | -1.745528 | -0.698821 | 2.126371  |

-----  
Harmonic frequencies (cm<sup>-1</sup>), IR intensities (KM/Mole), Raman scattering activities (A<sup>4</sup>/AMU), depolarization ratios for plane and unpolarized incident light, reduced masses (AMU), force constants (mDyne/A), and normal coordinates:

|                | 1       | 2       | 3       |
|----------------|---------|---------|---------|
|                | A       | A       | A       |
| Frequencies -- | 13.4447 | 27.7376 | 33.3629 |
| Red. masses -- | 6.1127  | 5.5148  | 4.3649  |
| Frc consts --  | 0.0007  | 0.0025  | 0.0029  |
| IR Inten --    | 0.0085  | 0.3245  | 0.3600  |

***N*(22)-Me-*N*(2)-H-NCTPP**

E(RB3LYP) = -1953.05238197 A.U.

Stoichiometry C45H32N4  
 Framework group C1[X(C45H32N4)]  
 Deg. of freedom 237  
 Full point group C1 NOp 1  
 Largest Abelian subgroup C1 NOp 1  
 Largest concise Abelian subgroup C1 NOp 1

Standard orientation:

| Center Number | Atomic Number | Atomic Type | Coordinates (Angstroms) |           |           |
|---------------|---------------|-------------|-------------------------|-----------|-----------|
|               |               |             | X                       | Y         | Z         |
| 1             | 7             | 0           | -4.043659               | -0.206884 | 0.572501  |
| 2             | 1             | 0           | -4.900193               | 0.233106  | 0.873626  |
| 3             | 7             | 0           | 0.549828                | -2.149261 | 0.427979  |
| 4             | 7             | 0           | 2.026673                | 0.493164  | -0.064179 |
| 5             | 7             | 0           | -0.528001               | 2.095771  | 0.021735  |
| 6             | 6             | 0           | -2.946718               | 0.492693  | 0.044322  |
| 7             | 6             | 0           | -1.964637               | -0.457546 | -0.208919 |
| 8             | 6             | 0           | -3.755056               | -1.517595 | 0.675943  |
| 9             | 6             | 0           | -2.446817               | -1.731433 | 0.191986  |
| 10            | 6             | 0           | -1.773107               | -3.013321 | 0.117706  |
| 11            | 6             | 0           | -0.384131               | -3.119729 | 0.039628  |
| 12            | 6             | 0           | 0.359367                | -4.169667 | -0.609538 |
| 13            | 6             | 0           | 1.671288                | -3.804176 | -0.651984 |
| 14            | 6             | 0           | 1.811750                | -2.515922 | -0.020634 |
| 15            | 6             | 0           | 2.996832                | -1.766348 | 0.070971  |
| 16            | 6             | 0           | 3.050885                | -0.338880 | 0.194471  |
| 17            | 6             | 0           | 4.256843                | 0.406404  | 0.587876  |
| 18            | 6             | 0           | 3.919510                | 1.715208  | 0.539200  |
| 19            | 6             | 0           | 2.507616                | 1.765673  | 0.124675  |
| 20            | 6             | 0           | 1.787013                | 2.959022  | -0.028561 |
| 21            | 6             | 0           | 0.362155                | 3.072216  | -0.201568 |
| 22            | 6             | 0           | -0.312389               | 4.308795  | -0.625175 |
| 23            | 6             | 0           | -1.641875               | 4.040364  | -0.624792 |
| 24            | 6             | 0           | -1.768394               | 2.643112  | -0.213749 |
| 25            | 6             | 0           | -2.959598               | 1.918216  | -0.103950 |
| 26            | 6             | 0           | -2.587617               | -4.244850 | 0.015141  |
| 27            | 6             | 0           | -2.229984               | -5.410119 | 0.723201  |
| 28            | 6             | 0           | -2.994235               | -6.571282 | 0.631543  |
| 29            | 6             | 0           | -4.140867               | -6.598904 | -0.164692 |
| 30            | 6             | 0           | -4.513164               | -5.453355 | -0.871676 |
| 31            | 6             | 0           | -3.748776               | -4.292160 | -0.783617 |
| 32            | 6             | 0           | 4.277565                | -2.511924 | -0.070628 |
| 33            | 6             | 0           | 4.529831                | -3.670178 | 0.688274  |
| 34            | 6             | 0           | 5.725855                | -4.373675 | 0.553855  |
| 35            | 6             | 0           | 6.701914                | -3.934646 | -0.342247 |
| 36            | 6             | 0           | 6.469156                | -2.787502 | -1.103809 |
| 37            | 6             | 0           | 5.272391                | -2.085832 | -0.971290 |
| 38            | 6             | 0           | 2.556058                | 4.239804  | -0.002941 |
| 39            | 6             | 0           | 3.609979                | 4.469188  | -0.904385 |
| 40            | 6             | 0           | 4.326132                | 5.665941  | -0.881040 |
| 41            | 6             | 0           | 4.005928                | 6.658123  | 0.046686  |
| 42            | 6             | 0           | 2.961387                | 6.445892  | 0.948837  |
| 43            | 6             | 0           | 2.241923                | 5.252156  | 0.921123  |
| 44            | 6             | 0           | -4.271216               | 2.612844  | -0.122550 |
| 45            | 6             | 0           | -4.501146               | 3.748609  | 0.677681  |
| 46            | 6             | 0           | -5.737640               | 4.391175  | 0.668852  |
| 47            | 6             | 0           | -6.775196               | 3.913264  | -0.134312 |
| 48            | 6             | 0           | -6.566129               | 2.786068  | -0.931132 |
| 49            | 6             | 0           | -5.330336               | 2.140633  | -0.923904 |
| 50            | 6             | 0           | 0.339950                | -1.234922 | 1.555181  |
| 51            | 1             | 0           | -0.999668               | -0.227103 | -0.629091 |
| 52            | 1             | 0           | -4.459661               | -2.221481 | 1.093435  |
| 53            | 1             | 0           | -0.096197               | -5.026822 | -1.082917 |
| 54            | 1             | 0           | 2.477098                | -4.318318 | -1.153959 |
| 55            | 1             | 0           | 5.200973                | -0.024831 | 0.889213  |
| 56            | 1             | 0           | 4.533147                | 2.564533  | 0.801714  |
| 57            | 1             | 0           | 0.171877                | 5.233032  | -0.905672 |
| 58            | 1             | 0           | -2.449074               | 4.695083  | -0.921406 |
| 59            | 1             | 0           | -1.355206               | -5.386876 | 1.364868  |
| 60            | 1             | 0           | -2.700299               | -7.453044 | 1.193791  |
| 61            | 1             | 0           | -4.738407               | -7.503079 | -0.233547 |
| 62            | 1             | 0           | -5.395936               | -5.468070 | -1.504750 |
| 63            | 1             | 0           | -4.028990               | -3.416711 | -1.360219 |
| 64            | 1             | 0           | 3.782308                | -4.005923 | 1.400367  |
| 65            | 1             | 0           | 5.899071                | -5.260382 | 1.157219  |
| 66            | 1             | 0           | 7.634917                | -4.480834 | -0.446476 |

*N*(22)-Me-*N*(2)-H-NCTPP

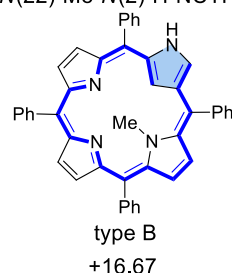

|    |   |   |           |           |           |
|----|---|---|-----------|-----------|-----------|
| 67 | 1 | 0 | 7.218212  | -2.442662 | -1.811090 |
| 68 | 1 | 0 | 5.090685  | -1.205922 | -1.579865 |
| 69 | 1 | 0 | 3.854046  | 3.703663  | -1.634044 |
| 70 | 1 | 0 | 5.132001  | 5.824407  | -1.592136 |
| 71 | 1 | 0 | 4.564416  | 7.589532  | 0.066206  |
| 72 | 1 | 0 | 2.708512  | 7.209729  | 1.678808  |
| 73 | 1 | 0 | 1.435346  | 5.088385  | 1.628967  |
| 74 | 1 | 0 | -3.703747 | 4.110036  | 1.318257  |
| 75 | 1 | 0 | -5.893983 | 5.262469  | 1.298215  |
| 76 | 1 | 0 | -7.738404 | 4.414699  | -0.139019 |
| 77 | 1 | 0 | -7.363130 | 2.414028  | -1.568529 |
| 78 | 1 | 0 | -5.165086 | 1.282426  | -1.568299 |
| 79 | 1 | 0 | 0.169249  | -0.210519 | 1.221940  |
| 80 | 1 | 0 | 1.236084  | -1.253293 | 2.179501  |
| 81 | 1 | 0 | -0.507652 | -1.597392 | 2.138276  |

-----  
Harmonic frequencies (cm<sup>-1</sup>), IR intensities (KM/Mole), Raman scattering activities (A<sup>4</sup>/AMU), depolarization ratios for plane and unpolarized incident light, reduced masses (AMU), force constants (mDyne/A), and normal coordinates:

|                | 1       | 2       | 3       |
|----------------|---------|---------|---------|
|                | A       | A       | A       |
| Frequencies -- | 14.5302 | 27.9792 | 30.9453 |
| Red. masses -- | 6.0786  | 5.3542  | 4.3929  |
| Frc consts --  | 0.0008  | 0.0025  | 0.0025  |
| IR Inten --    | 0.0455  | 0.6927  | 0.2129  |



***N*(23)-Me-*N*(22)-H-NCTPP**

E(RB3LYP) = -1953.05783441 A.U.

Stoichiometry C45H32N4  
 Framework group C1[X(C45H32N4)]  
 Deg. of freedom 237  
 Full point group C1 NOp 1  
 Largest Abelian subgroup C1 NOp 1  
 Largest concise Abelian subgroup C1 NOp 1

Standard orientation:

| Center Number | Atomic Number | Atomic Type | Coordinates (Angstroms) |           |           |
|---------------|---------------|-------------|-------------------------|-----------|-----------|
|               |               |             | X                       | Y         | Z         |
| 1             | 1             | 0           | 4.717881                | -1.668044 | 0.157623  |
| 2             | 7             | 0           | 3.982837                | -0.996527 | -0.006926 |
| 3             | 7             | 0           | 0.187705                | 2.150415  | 0.030539  |
| 4             | 7             | 0           | -2.119374               | 0.149073  | 0.456937  |
| 5             | 7             | 0           | -0.162818               | -2.165274 | -0.000098 |
| 6             | 6             | 0           | 2.633877                | -1.345247 | -0.212670 |
| 7             | 6             | 0           | 1.942577                | -0.144053 | -0.361590 |
| 8             | 6             | 0           | 4.124805                | 0.337034  | 0.010526  |
| 9             | 6             | 0           | 2.859580                | 0.932346  | -0.199723 |
| 10            | 6             | 0           | 2.620445                | 2.352040  | -0.086816 |
| 11            | 6             | 0           | 1.344388                | 2.898848  | 0.045988  |
| 12            | 6             | 0           | 1.019898                | 4.317347  | 0.210841  |
| 13            | 6             | 0           | -0.329917               | 4.388796  | 0.315254  |
| 14            | 6             | 0           | -0.827867               | 3.012686  | 0.179252  |
| 15            | 6             | 0           | -2.216260               | 2.650035  | 0.121125  |
| 16            | 6             | 0           | -2.723482               | 1.342417  | 0.056012  |
| 17            | 6             | 0           | -3.971399               | 0.986639  | -0.569965 |
| 18            | 6             | 0           | -4.079449               | -0.370390 | -0.578271 |
| 19            | 6             | 0           | -2.904910               | -0.926724 | 0.042701  |
| 20            | 6             | 0           | -2.611015               | -2.300656 | 0.094480  |
| 21            | 6             | 0           | -1.296635               | -2.870103 | 0.140998  |
| 22            | 6             | 0           | -1.005115               | -4.304431 | 0.269646  |
| 23            | 6             | 0           | 0.342654                | -4.428980 | 0.174257  |
| 24            | 6             | 0           | 0.867426                | -3.071552 | 0.018678  |
| 25            | 6             | 0           | 2.213243                | -2.710459 | -0.099020 |
| 26            | 6             | 0           | 3.813719                | 3.244976  | -0.055686 |
| 27            | 6             | 0           | 4.067787                | 4.092697  | 1.036959  |
| 28            | 6             | 0           | 5.194724                | 4.913933  | 1.058489  |
| 29            | 6             | 0           | 6.093078                | 4.905103  | -0.009967 |
| 30            | 6             | 0           | 5.857425                | 4.065274  | -1.099855 |
| 31            | 6             | 0           | 4.732960                | 3.240791  | -1.120551 |
| 32            | 6             | 0           | -3.219373               | 3.746316  | -0.023860 |
| 33            | 6             | 0           | -4.320660               | 3.825313  | 0.846999  |
| 34            | 6             | 0           | -5.269155               | 4.839348  | 0.717453  |
| 35            | 6             | 0           | -5.139395               | 5.796479  | -0.289843 |
| 36            | 6             | 0           | -4.054947               | 5.729431  | -1.167221 |
| 37            | 6             | 0           | -3.105956               | 4.716842  | -1.036091 |
| 38            | 6             | 0           | -3.773521               | -3.224895 | -0.052876 |
| 39            | 6             | 0           | -3.810989               | -4.203909 | -1.062810 |
| 40            | 6             | 0           | -4.907179               | -5.054727 | -1.195785 |
| 41            | 6             | 0           | -5.992617               | -4.946947 | -0.323777 |
| 42            | 6             | 0           | -5.974008               | -3.977958 | 0.680482  |
| 43            | 6             | 0           | -4.877612               | -3.126597 | 0.812700  |
| 44            | 6             | 0           | 3.274459                | -3.756669 | -0.037091 |
| 45            | 6             | 0           | 3.388166                | -4.616591 | 1.070244  |
| 46            | 6             | 0           | 4.391830                | -5.582921 | 1.125201  |
| 47            | 6             | 0           | 5.309294                | -5.706873 | 0.080079  |
| 48            | 6             | 0           | 5.215581                | -4.855981 | -1.022421 |
| 49            | 6             | 0           | 4.211090                | -3.889311 | -1.079955 |
| 50            | 1             | 0           | 0.889368                | -0.056387 | -0.548009 |
| 51            | 1             | 0           | 5.081175                | 0.800706  | 0.199817  |
| 52            | 1             | 0           | 1.725268                | 5.135026  | 0.241280  |
| 53            | 1             | 0           | -0.931553               | 5.272715  | 0.470446  |
| 54            | 1             | 0           | -4.631963               | 1.697799  | -1.042074 |
| 55            | 1             | 0           | -4.844565               | -0.962183 | -1.057450 |
| 56            | 1             | 0           | -1.729217               | -5.092178 | 0.419475  |
| 57            | 1             | 0           | 0.922300                | -5.340373 | 0.205541  |
| 58            | 1             | 0           | 3.381593                | 4.089714  | 1.877713  |
| 59            | 1             | 0           | 5.374584                | 5.556245  | 1.915885  |
| 60            | 1             | 0           | 6.969869                | 5.545754  | 0.007414  |
| 61            | 1             | 0           | 6.547039                | 4.055411  | -1.939199 |
| 62            | 1             | 0           | 4.546763                | 2.598725  | -1.976086 |
| 63            | 1             | 0           | -4.419902               | 3.088154  | 1.637855  |
| 64            | 1             | 0           | -6.107094               | 4.883856  | 1.407390  |
| 65            | 1             | 0           | -5.877450               | 6.586740  | -0.392108 |
| 66            | 1             | 0           | -3.951550               | 6.462886  | -1.961896 |

*N*(23)-Me-*N*(22)-H-NCTPP

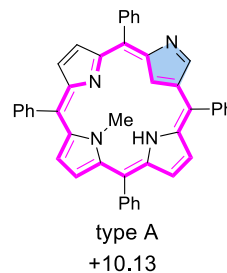

|    |   |   |           |           |           |
|----|---|---|-----------|-----------|-----------|
| 67 | 1 | 0 | -2.273990 | 4.661522  | -1.730794 |
| 68 | 1 | 0 | -2.978705 | -4.281013 | -1.755007 |
| 69 | 1 | 0 | -4.917566 | -5.797375 | -1.988599 |
| 70 | 1 | 0 | -6.845862 | -5.610874 | -0.427957 |
| 71 | 1 | 0 | -6.811637 | -3.887248 | 1.366262  |
| 72 | 1 | 0 | -4.862483 | -2.380398 | 1.601064  |
| 73 | 1 | 0 | 2.687773  | -4.511552 | 1.892326  |
| 74 | 1 | 0 | 4.462172  | -6.234903 | 1.991122  |
| 75 | 1 | 0 | 6.091099  | -6.459197 | 0.125016  |
| 76 | 1 | 0 | 5.919141  | -4.949466 | -1.844747 |
| 77 | 1 | 0 | 4.128232  | -3.244938 | -1.950474 |
| 78 | 6 | 0 | -1.196455 | 0.069161  | 1.591548  |
| 79 | 1 | 0 | -1.475292 | -0.794467 | 2.198332  |
| 80 | 1 | 0 | -0.165692 | -0.034115 | 1.267410  |
| 81 | 1 | 0 | -1.304721 | 0.978382  | 2.184816  |

-----  
Harmonic frequencies (cm<sup>-1</sup>), IR intensities (KM/Mole), Raman scattering activities (A<sup>4</sup>/AMU), depolarization ratios for plane and unpolarized incident light, reduced masses (AMU), force constants (mDyne/A), and normal coordinates:

|                | 1       | 2       | 3       |
|----------------|---------|---------|---------|
|                | A       | A       | A       |
| Frequencies -- | 15.0397 | 28.8217 | 31.1930 |
| Red. masses -- | 6.0454  | 5.6648  | 4.1566  |
| Frc consts --  | 0.0008  | 0.0028  | 0.0024  |
| IR Inten --    | 0.0163  | 0.6618  | 0.0429  |

**N(23)-Me-N(24)-H-NCTPP**

E(RB3LYP) = -1953.06275571 A.U.

Stoichiometry C45H32N4  
 Framework group C1[X(C45H32N4)]  
 Deg. of freedom 237  
 Full point group C1 NOp 1  
 Largest Abelian subgroup C1 NOp 1  
 Largest concise Abelian subgroup C1 NOp 1

Standard orientation:

| Center Number | Atomic Number | Atomic Type | Coordinates (Angstroms) |           |           |
|---------------|---------------|-------------|-------------------------|-----------|-----------|
|               |               |             | X                       | Y         | Z         |
| 1             | 7             | 0           | -4.042380               | 1.237398  | 0.026314  |
| 2             | 7             | 0           | -0.319783               | -2.125555 | -0.002376 |
| 3             | 7             | 0           | 2.098795                | -0.260786 | 0.429608  |
| 4             | 7             | 0           | 0.251944                | 2.178058  | -0.015522 |
| 5             | 1             | 0           | 0.124180                | 1.181592  | -0.059827 |
| 6             | 6             | 0           | -2.663165               | 1.456511  | -0.255666 |
| 7             | 6             | 0           | -2.000822               | 0.223542  | -0.433412 |
| 8             | 6             | 0           | -4.196387               | -0.053339 | 0.055627  |
| 9             | 6             | 0           | -2.949056               | -0.789432 | -0.202165 |
| 10            | 6             | 0           | -2.773338               | -2.187172 | -0.064670 |
| 11            | 6             | 0           | -1.501384               | -2.807804 | 0.020091  |
| 12            | 6             | 0           | -1.256193               | -4.241347 | 0.140774  |
| 13            | 6             | 0           | 0.092784                | -4.395635 | 0.203169  |
| 14            | 6             | 0           | 0.662726                | -3.053689 | 0.098635  |
| 15            | 6             | 0           | 2.055975                | -2.763973 | 0.040434  |
| 16            | 6             | 0           | 2.643831                | -1.482707 | 0.001669  |
| 17            | 6             | 0           | 3.909731                | -1.185015 | -0.589272 |
| 18            | 6             | 0           | 4.107938                | 0.170341  | -0.551849 |
| 19            | 6             | 0           | 2.971005                | 0.774098  | 0.063833  |
| 20            | 6             | 0           | 2.738753                | 2.167548  | 0.126363  |
| 21            | 6             | 0           | 1.473667                | 2.801481  | 0.119296  |
| 22            | 6             | 0           | 1.190540                | 4.203439  | 0.149067  |
| 23            | 6             | 0           | -0.166447               | 4.376855  | 0.004151  |
| 24            | 6             | 0           | -0.785993               | 3.092918  | -0.084652 |
| 25            | 6             | 0           | -2.159669               | 2.777606  | -0.177130 |
| 26            | 6             | 0           | -3.995944               | -3.034237 | 0.044566  |
| 27            | 6             | 0           | -4.211731               | -3.875936 | 1.149695  |
| 28            | 6             | 0           | -5.367733               | -4.649829 | 1.242544  |
| 29            | 6             | 0           | -6.329876               | -4.601385 | 0.232069  |
| 30            | 6             | 0           | -6.130625               | -3.768090 | -0.869680 |
| 31            | 6             | 0           | -4.978076               | -2.988682 | -0.960164 |
| 32            | 6             | 0           | 3.002911                | -3.909140 | -0.118634 |
| 33            | 6             | 0           | 4.077412                | -4.073997 | 0.772546  |
| 34            | 6             | 0           | 4.969085                | -5.136662 | 0.632452  |
| 35            | 6             | 0           | 4.809680                | -6.052514 | -0.408616 |
| 36            | 6             | 0           | 3.752489                | -5.897472 | -1.307514 |
| 37            | 6             | 0           | 2.857071                | -4.838515 | -1.163649 |
| 38            | 6             | 0           | 3.950719                | 3.038003  | 0.046841  |
| 39            | 6             | 0           | 4.114537                | 3.983512  | -0.980527 |
| 40            | 6             | 0           | 5.258486                | 4.778361  | -1.044296 |
| 41            | 6             | 0           | 6.263835                | 4.642743  | -0.085066 |
| 42            | 6             | 0           | 6.119526                | 3.701785  | 0.935711  |
| 43            | 6             | 0           | 4.976103                | 2.906636  | 0.999017  |
| 44            | 6             | 0           | -3.132446               | 3.905981  | -0.112176 |
| 45            | 6             | 0           | -3.112481               | 4.828830  | 0.946192  |
| 46            | 6             | 0           | -4.022828               | 5.884818  | 0.990938  |
| 47            | 6             | 0           | -4.968158               | 6.038313  | -0.023168 |
| 48            | 6             | 0           | -5.004677               | 5.121317  | -1.076023 |
| 49            | 6             | 0           | -4.101386               | 4.062401  | -1.116802 |
| 50            | 1             | 0           | -0.993584               | 0.009866  | -0.747363 |
| 51            | 1             | 0           | -5.153208               | -0.501689 | 0.300800  |
| 52            | 1             | 0           | -2.007365               | -5.017021 | 0.164343  |
| 53            | 1             | 0           | 0.644698                | -5.317016 | 0.318101  |
| 54            | 1             | 0           | 4.537537                | -1.918567 | -1.072058 |
| 55            | 1             | 0           | 4.917033                | 0.724410  | -1.003243 |
| 56            | 1             | 0           | 1.934472                | 4.976172  | 0.263727  |
| 57            | 1             | 0           | -0.697754               | 5.314753  | -0.036432 |
| 58            | 1             | 0           | -3.474819               | -3.903787 | 1.945961  |
| 59            | 1             | 0           | -5.520078               | -5.286084 | 2.109670  |
| 60            | 1             | 0           | -7.229276               | -5.205795 | 0.304756  |
| 61            | 1             | 0           | -6.872592               | -3.724770 | -1.661766 |
| 62            | 1             | 0           | -4.822048               | -2.347058 | -1.821792 |
| 63            | 1             | 0           | 4.200872                | -3.367097 | 1.587233  |
| 64            | 1             | 0           | 5.786258                | -5.250664 | 1.338893  |
| 65            | 1             | 0           | 5.504760                | -6.879493 | -0.520330 |
| 66            | 1             | 0           | 3.627309                | -6.599028 | -2.127241 |

N(23)-Me-N(24)-H-NCTPP

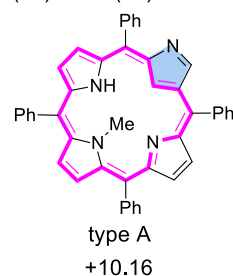

|    |   |   |           |           |           |
|----|---|---|-----------|-----------|-----------|
| 67 | 1 | 0 | 2.043414  | -4.715371 | -1.871022 |
| 68 | 1 | 0 | 3.344860  | 4.080537  | -1.739643 |
| 69 | 1 | 0 | 5.368401  | 5.497634  | -1.850745 |
| 70 | 1 | 0 | 7.154126  | 5.262572  | -0.135493 |
| 71 | 1 | 0 | 6.895793  | 3.588968  | 1.686990  |
| 72 | 1 | 0 | 4.864469  | 2.179887  | 1.797837  |
| 73 | 1 | 0 | -2.395400 | 4.700526  | 1.750898  |
| 74 | 1 | 0 | -3.997521 | 6.581621  | 1.823924  |
| 75 | 1 | 0 | -5.676526 | 6.861055  | 0.009822  |
| 76 | 1 | 0 | -5.741982 | 5.228858  | -1.866345 |
| 77 | 1 | 0 | -4.138044 | 3.346050  | -1.930119 |
| 78 | 6 | 0 | 1.255835  | -0.181960 | 1.633760  |
| 79 | 1 | 0 | 1.360188  | 0.810163  | 2.071507  |
| 80 | 1 | 0 | 0.213653  | -0.401658 | 1.398331  |
| 81 | 1 | 0 | 1.600787  | -0.924409 | 2.358610  |

-----  
Harmonic frequencies (cm<sup>-1</sup>), IR intensities (KM/Mole), Raman scattering activities (A<sup>4</sup>/AMU), depolarization ratios for plane and unpolarized incident light, reduced masses (AMU), force constants (mDyne/A), and normal coordinates:

|                | 1       | 2       | 3       |
|----------------|---------|---------|---------|
|                | A       | A       | A       |
| Frequencies -- | 15.5885 | 29.4282 | 30.8388 |
| Red. masses -- | 6.0611  | 5.6434  | 4.2303  |
| Frc consts --  | 0.0009  | 0.0029  | 0.0024  |
| IR Inten --    | 0.0156  | 0.5035  | 0.1395  |

***N*(23)-Me-*N*(2)-H-NCTPP**

E(RB3LYP) = -1953.06279144 A.U.

Stoichiometry C45H32N4  
 Framework group C1[X(C45H32N4)]  
 Deg. of freedom 237  
 Full point group C1 NOp 1  
 Largest Abelian subgroup C1 NOp 1  
 Largest concise Abelian subgroup C1 NOp 1

Standard orientation:

| Center Number | Atomic Number | Atomic Type | Coordinates (Angstroms) |           |           |
|---------------|---------------|-------------|-------------------------|-----------|-----------|
|               |               |             | X                       | Y         | Z         |
| 1             | 7             | 0           | 4.238706                | -0.025544 | 0.073940  |
| 2             | 7             | 0           | -0.344936               | 2.172820  | -0.005360 |
| 3             | 1             | 0           | -0.185455               | 1.185156  | -0.108603 |
| 4             | 7             | 0           | -2.084959               | -0.341550 | 0.422051  |
| 5             | 7             | 0           | 0.410294                | -2.104263 | -0.015542 |
| 6             | 6             | 0           | 2.993498                | -0.666310 | -0.173204 |
| 7             | 6             | 0           | 1.989811                | 0.292855  | -0.434008 |
| 8             | 6             | 0           | 3.996107                | 1.248704  | 0.000645  |
| 9             | 6             | 0           | 2.583527                | 1.558328  | -0.294262 |
| 10            | 6             | 0           | 2.029118                | 2.864579  | -0.220959 |
| 11            | 6             | 0           | 0.656133                | 3.129366  | -0.077955 |
| 12            | 6             | 0           | -0.010262               | 4.388017  | 0.070530  |
| 13            | 6             | 0           | -1.351672               | 4.158439  | 0.249998  |
| 14            | 6             | 0           | -1.585645               | 2.745044  | 0.178625  |
| 15            | 6             | 0           | -2.822619               | 2.067260  | 0.190574  |
| 16            | 6             | 0           | -2.997355               | 0.663634  | 0.078439  |
| 17            | 6             | 0           | -4.101217               | 0.034342  | -0.563219 |
| 18            | 6             | 0           | -3.845367               | -1.312467 | -0.636531 |
| 19            | 6             | 0           | -2.576410               | -1.573443 | -0.041673 |
| 20            | 6             | 0           | -1.937433               | -2.834611 | -0.032631 |
| 21            | 6             | 0           | -0.539675               | -3.075290 | 0.033287  |
| 22            | 6             | 0           | 0.082951                | -4.394264 | 0.100011  |
| 23            | 6             | 0           | 1.425855                | -4.181663 | 0.073187  |
| 24            | 6             | 0           | 1.613777                | -2.735866 | 0.009014  |
| 25            | 6             | 0           | 2.872341                | -2.063898 | -0.025156 |
| 26            | 6             | 0           | 2.965128                | 4.027815  | -0.227227 |
| 27            | 6             | 0           | 3.009329                | 4.946347  | 0.835510  |
| 28            | 6             | 0           | 3.900510                | 6.018780  | 0.815774  |
| 29            | 6             | 0           | 4.766202                | 6.193281  | -0.265176 |
| 30            | 6             | 0           | 4.739498                | 5.283375  | -1.323392 |
| 31            | 6             | 0           | 3.850608                | 4.209354  | -1.303245 |
| 32            | 6             | 0           | -4.070513               | 2.887510  | 0.160881  |
| 33            | 6             | 0           | -5.076743               | 2.675977  | 1.119279  |
| 34            | 6             | 0           | -6.252210               | 3.425219  | 1.102222  |
| 35            | 6             | 0           | -6.449302               | 4.399428  | 0.121998  |
| 36            | 6             | 0           | -5.464220               | 4.613973  | -0.843600 |
| 37            | 6             | 0           | -4.288177               | 3.864840  | -0.826085 |
| 38            | 6             | 0           | -2.841110               | -4.008817 | -0.229362 |
| 39            | 6             | 0           | -2.653887               | -4.902773 | -1.298157 |
| 40            | 6             | 0           | -3.508368               | -5.989895 | -1.477046 |
| 41            | 6             | 0           | -4.564123               | -6.208640 | -0.589874 |
| 42            | 6             | 0           | -4.764143               | -5.328057 | 0.474467  |
| 43            | 6             | 0           | -3.914441               | -4.236642 | 0.649105  |
| 44            | 6             | 0           | 4.113788                | -2.864747 | 0.160828  |
| 45            | 6             | 0           | 4.260139                | -3.733223 | 1.255757  |
| 46            | 6             | 0           | 5.423396                | -4.484148 | 1.422462  |
| 47            | 6             | 0           | 6.459878                | -4.386205 | 0.493705  |
| 48            | 6             | 0           | 6.329942                | -3.522217 | -0.595739 |
| 49            | 6             | 0           | 5.173655                | -2.763174 | -0.756192 |
| 50            | 1             | 0           | 0.994401                | 0.010783  | -0.731439 |
| 51            | 1             | 0           | 4.768161                | 1.984802  | 0.197709  |
| 52            | 1             | 0           | 0.483994                | 5.346912  | 0.049507  |
| 53            | 1             | 0           | -2.120505               | 4.897187  | 0.414564  |
| 54            | 1             | 0           | -4.930176               | 0.567053  | -1.004239 |
| 55            | 1             | 0           | -4.438902               | -2.057319 | -1.144684 |
| 56            | 1             | 0           | -0.430857               | -5.341813 | 0.168383  |
| 57            | 1             | 0           | 2.208217                | -4.925783 | 0.082264  |
| 58            | 1             | 0           | 2.355983                | 4.801289  | 1.690130  |
| 59            | 1             | 0           | 3.925596                | 6.712197  | 1.651475  |
| 60            | 1             | 0           | 5.460577                | 7.028137  | -0.279752 |
| 61            | 1             | 0           | 5.410840                | 5.409519  | -2.167806 |
| 62            | 1             | 0           | 3.828406                | 3.505532  | -2.129473 |
| 63            | 1             | 0           | -4.924748               | 1.923018  | 1.886594  |
| 64            | 1             | 0           | -7.012640               | 3.250478  | 1.857848  |
| 65            | 1             | 0           | -7.364865               | 4.983282  | 0.107738  |
| 66            | 1             | 0           | -5.614931               | 5.359125  | -1.619410 |

*N*(23)-Me-*N*(2)-H-NCTPP

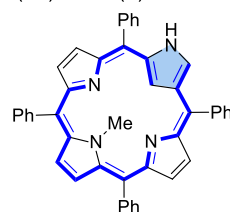

type B  
+13.25

|    |   |   |           |           |           |
|----|---|---|-----------|-----------|-----------|
| 67 | 1 | 0 | -3.534783 | 4.022635  | -1.591345 |
| 68 | 1 | 0 | -1.840682 | -4.729746 | -1.995403 |
| 69 | 1 | 0 | -3.352167 | -6.663618 | -2.314567 |
| 70 | 1 | 0 | -5.227072 | -7.057596 | -0.728704 |
| 71 | 1 | 0 | -5.580746 | -5.491781 | 1.171704  |
| 72 | 1 | 0 | -4.069722 | -3.556235 | 1.480621  |
| 73 | 1 | 0 | 3.463757  | -3.800031 | 1.989963  |
| 74 | 1 | 0 | 5.520522  | -5.141624 | 2.281763  |
| 75 | 1 | 0 | 7.364742  | -4.973685 | 0.620540  |
| 76 | 1 | 0 | 7.133935  | -3.436056 | -1.321070 |
| 77 | 1 | 0 | 5.079356  | -2.086301 | -1.597683 |
| 78 | 6 | 0 | -1.246001 | -0.250575 | 1.629029  |
| 79 | 1 | 0 | -1.557379 | -1.023461 | 2.336919  |
| 80 | 1 | 0 | -0.195335 | -0.415894 | 1.390079  |
| 81 | 1 | 0 | -1.397053 | 0.726344  | 2.086945  |

-----  
Harmonic frequencies (cm<sup>-1</sup>), IR intensities (KM/Mole), Raman scattering activities (A<sup>4</sup>/AMU), depolarization ratios for plane and unpolarized incident light, reduced masses (AMU), force constants (mDyne/A), and normal coordinates:

|                | 1       | 2       | 3       |
|----------------|---------|---------|---------|
|                | A       | A       | A       |
| Frequencies -- | 14.4250 | 27.0442 | 27.9266 |
| Red. masses -- | 6.0414  | 4.6314  | 4.9612  |
| Frc consts --  | 0.0007  | 0.0020  | 0.0023  |
| IR Inten --    | 0.0110  | 0.4340  | 0.1335  |

***N(24)-Me-N(22)-H-NCTPP***

E(RB3LYP) = -1953.07626031 A.U.

Stoichiometry C45H32N4  
 Framework group C1[X(C45H32N4)]  
 Deg. of freedom 237  
 Full point group C1  
 Largest Abelian subgroup C1 NOp 1  
 Largest concise Abelian subgroup C1 NOp 1

Standard orientation:

| Center Number | Atomic Number | Atomic Type | Coordinates (Angstroms) |           |           |
|---------------|---------------|-------------|-------------------------|-----------|-----------|
|               |               |             | X                       | Y         | Z         |
| 1             | 6             | 0           | 0.944893                | -1.169196 | 1.673304  |
| 2             | 7             | 0           | 3.687790                | 1.919737  | 0.607413  |
| 3             | 7             | 0           | -1.372426               | 1.725774  | -0.076007 |
| 4             | 7             | 0           | -1.695731               | -1.115367 | 0.073086  |
| 5             | 7             | 0           | 1.396317                | -1.759452 | 0.409119  |
| 6             | 6             | 0           | 2.959274                | 0.789312  | 0.162242  |
| 7             | 6             | 0           | 1.647240                | 1.163547  | -0.223694 |
| 8             | 6             | 0           | 2.866761                | 2.925514  | 0.495436  |
| 9             | 6             | 0           | 1.543936                | 2.543633  | -0.024295 |
| 10            | 6             | 0           | 0.442311                | 3.432958  | -0.173535 |
| 11            | 6             | 0           | -0.895152               | 3.015905  | -0.250748 |
| 12            | 6             | 0           | -2.058593               | 3.828986  | -0.477775 |
| 13            | 6             | 0           | -3.171851               | 3.035312  | -0.402573 |
| 14            | 6             | 0           | -2.745116               | 1.691810  | -0.131497 |
| 15            | 6             | 0           | -3.532622               | 0.542475  | 0.060666  |
| 16            | 6             | 0           | -3.002800               | -0.763619 | 0.230855  |
| 17            | 6             | 0           | -3.815433               | -1.924353 | 0.587678  |
| 18            | 6             | 0           | -2.976350               | -2.986847 | 0.599576  |
| 19            | 6             | 0           | -1.648792               | -2.478155 | 0.250336  |
| 20            | 6             | 0           | -0.534053               | -3.320290 | 0.047851  |
| 21            | 6             | 0           | 0.814977                | -2.895685 | -0.130079 |
| 22            | 6             | 0           | 1.800892                | -3.532920 | -0.931447 |
| 23            | 6             | 0           | 2.951846                | -2.772096 | -0.889263 |
| 24            | 6             | 0           | 2.701337                | -1.641502 | -0.072743 |
| 25            | 6             | 0           | 3.534893                | -0.495964 | 0.098067  |
| 26            | 6             | 0           | 0.727552                | 4.895557  | -0.211263 |
| 27            | 6             | 0           | 0.101769                | 5.794681  | 0.670474  |
| 28            | 6             | 0           | 0.394779                | 7.157135  | 0.629172  |
| 29            | 6             | 0           | 1.319953                | 7.649872  | -0.292912 |
| 30            | 6             | 0           | 1.955119                | 6.768682  | -1.169633 |
| 31            | 6             | 0           | 1.665395                | 5.405840  | -1.126722 |
| 32            | 6             | 0           | -5.014947               | 0.726001  | 0.082818  |
| 33            | 6             | 0           | -5.627396               | 1.556510  | 1.036637  |
| 34            | 6             | 0           | -7.011430               | 1.728926  | 1.053601  |
| 35            | 6             | 0           | -7.812130               | 1.073549  | 0.116897  |
| 36            | 6             | 0           | -7.218368               | 0.244380  | -0.836366 |
| 37            | 6             | 0           | -5.834535               | 0.072666  | -0.853350 |
| 38            | 6             | 0           | -0.764148               | -4.783425 | -0.125862 |
| 39            | 6             | 0           | -1.735255               | -5.271691 | -1.019697 |
| 40            | 6             | 0           | -1.932683               | -6.641790 | -1.184914 |
| 41            | 6             | 0           | -1.163187               | -7.555551 | -0.462838 |
| 42            | 6             | 0           | -0.189015               | -7.088370 | 0.421800  |
| 43            | 6             | 0           | 0.011739                | -5.718984 | 0.583521  |
| 44            | 6             | 0           | 4.998002                | -0.698403 | 0.112577  |
| 45            | 6             | 0           | 5.552101                | -1.847679 | 0.710916  |
| 46            | 6             | 0           | 6.928699                | -2.060111 | 0.719152  |
| 47            | 6             | 0           | 7.784040                | -1.129407 | 0.127793  |
| 48            | 6             | 0           | 7.251041                | 0.016213  | -0.468396 |
| 49            | 6             | 0           | 5.876657                | 0.232495  | -0.477005 |
| 50            | 1             | 0           | -0.848233               | 0.867453  | 0.052884  |
| 51            | 1             | 0           | 0.931009                | 0.504078  | -0.689779 |
| 52            | 1             | 0           | 3.149105                | 3.923773  | 0.813152  |
| 53            | 1             | 0           | -2.029005               | 4.887410  | -0.686071 |
| 54            | 1             | 0           | -4.199685               | 3.337304  | -0.532570 |
| 55            | 1             | 0           | -4.870578               | -1.910599 | 0.818016  |
| 56            | 1             | 0           | -3.212454               | -4.011390 | 0.846598  |
| 57            | 1             | 0           | 1.621092                | -4.413559 | -1.529773 |
| 58            | 1             | 0           | 3.859468                | -2.922678 | -1.455109 |
| 59            | 1             | 0           | -0.600455               | 5.413865  | 1.405224  |
| 60            | 1             | 0           | -0.092940               | 7.832949  | 1.325796  |
| 61            | 1             | 0           | 1.547672                | 8.711263  | -0.324364 |
| 62            | 1             | 0           | 2.675826                | 7.142582  | -1.891078 |
| 63            | 1             | 0           | 2.154409                | 4.724213  | -1.815604 |
| 64            | 1             | 0           | -5.009953               | 2.056430  | 1.776730  |
| 65            | 1             | 0           | -7.464479               | 2.370094  | 1.804397  |
| 66            | 1             | 0           | -8.889858               | 1.207122  | 0.130080  |

*N(24)-Me-N(22)-H-NCTPP*

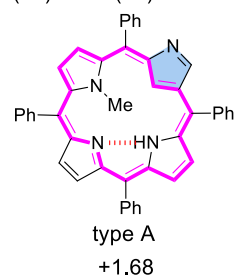

|    |   |   |           |           |           |
|----|---|---|-----------|-----------|-----------|
| 67 | 1 | 0 | -7.832550 | -0.265713 | -1.572967 |
| 68 | 1 | 0 | -5.375234 | -0.564519 | -1.602716 |
| 69 | 1 | 0 | -2.321738 | -4.565884 | -1.598391 |
| 70 | 1 | 0 | -2.682407 | -6.995545 | -1.886785 |
| 71 | 1 | 0 | -1.317688 | -8.622799 | -0.591770 |
| 72 | 1 | 0 | 0.413468  | -7.791348 | 0.989832  |
| 73 | 1 | 0 | 0.766939  | -5.361724 | 1.276541  |
| 74 | 1 | 0 | 4.894054  | -2.564763 | 1.190335  |
| 75 | 1 | 0 | 7.333330  | -2.948774 | 1.194851  |
| 76 | 1 | 0 | 8.857761  | -1.293495 | 0.133000  |
| 77 | 1 | 0 | 7.910258  | 0.743123  | -0.933864 |
| 78 | 1 | 0 | 5.469239  | 1.121805  | -0.940277 |
| 79 | 1 | 0 | 0.136309  | -0.457945 | 1.518384  |
| 80 | 1 | 0 | 1.788137  | -0.673299 | 2.150229  |
| 81 | 1 | 0 | 0.579425  | -1.969803 | 2.321205  |

-----  
Harmonic frequencies (cm<sup>-1</sup>), IR intensities (KM/Mole), Raman scattering activities (A<sup>4</sup>/AMU), depolarization ratios for plane and unpolarized incident light, reduced masses (AMU), force constants (mDyne/A), and normal coordinates:

|                | 1       | 2       | 3       |
|----------------|---------|---------|---------|
|                | A       | A       | A       |
| Frequencies -- | 14.0110 | 27.8391 | 31.8274 |
| Red. masses -- | 6.1187  | 5.6139  | 4.1442  |
| Frc consts --  | 0.0007  | 0.0026  | 0.0025  |
| IR Inten --    | 0.0083  | 0.4471  | 0.0605  |



**N(24)-Me-N(23)-H-NCTPP**

E(RB3LYP) = -1953.07471250 A.U.

Stoichiometry C45H32N4  
 Framework group C1[X(C45H32N4)]  
 Deg. of freedom 237  
 Full point group C1 NOp 1  
 Largest Abelian subgroup C1 NOp 1  
 Largest concise Abelian subgroup C1 NOp 1

Standard orientation:

| Center Number | Atomic Number | Atomic Type | Coordinates (Angstroms) |           |           |
|---------------|---------------|-------------|-------------------------|-----------|-----------|
|               |               |             | X                       | Y         | Z         |
| 1             | 6             | 0           | 1.130497                | -0.867185 | 1.582380  |
| 2             | 7             | 0           | 3.166137                | 2.705974  | 0.599912  |
| 3             | 7             | 0           | -1.659375               | 1.324827  | -0.101735 |
| 4             | 7             | 0           | -1.452838               | -1.535513 | 0.014152  |
| 5             | 1             | 0           | -0.899689               | -0.715331 | -0.210413 |
| 6             | 7             | 0           | 1.727638                | -1.382881 | 0.340798  |
| 7             | 6             | 0           | 2.712573                | 1.451297  | 0.115006  |
| 8             | 6             | 0           | 1.359285                | 1.534032  | -0.283874 |
| 9             | 6             | 0           | 2.138930                | 3.502791  | 0.503044  |
| 10            | 6             | 0           | 0.940898                | 2.842684  | -0.042825 |
| 11            | 6             | 0           | -0.346303               | 3.427641  | -0.187689 |
| 12            | 6             | 0           | -1.540528               | 2.682840  | -0.298635 |
| 13            | 6             | 0           | -2.845431               | 3.261487  | -0.595398 |
| 14            | 6             | 0           | -3.744643               | 2.245444  | -0.538657 |
| 15            | 6             | 0           | -2.983436               | 1.048676  | -0.204954 |
| 16            | 6             | 0           | -3.562744               | -0.239057 | 0.005395  |
| 17            | 6             | 0           | -2.822480               | -1.415288 | 0.168160  |
| 18            | 6             | 0           | -3.301010               | -2.725849 | 0.508320  |
| 19            | 6             | 0           | -2.236441               | -3.582349 | 0.521618  |
| 20            | 6             | 0           | -1.042920               | -2.846325 | 0.189026  |
| 21            | 6             | 0           | 0.242585                | -3.389077 | 0.022105  |
| 22            | 6             | 0           | 1.450497                | -2.652408 | -0.156163 |
| 23            | 6             | 0           | 2.575496                | -3.062702 | -0.917991 |
| 24            | 6             | 0           | 3.511940                | -2.048621 | -0.888676 |
| 25            | 6             | 0           | 2.987830                | -0.979749 | -0.123427 |
| 26            | 6             | 0           | 3.549644                | 0.318719  | 0.050031  |
| 27            | 6             | 0           | -0.422315               | 4.915374  | -0.178209 |
| 28            | 6             | 0           | -1.286065               | 5.604766  | 0.692007  |
| 29            | 6             | 0           | -1.328624               | 6.998066  | 0.701393  |
| 30            | 6             | 0           | -0.511505               | 7.732894  | -0.159726 |
| 31            | 6             | 0           | 0.354537                | 7.063609  | -1.026111 |
| 32            | 6             | 0           | 0.403358                | 5.670638  | -1.030826 |
| 33            | 6             | 0           | -5.050193               | -0.350905 | 0.067134  |
| 34            | 6             | 0           | -5.786283               | 0.381278  | 1.014886  |
| 35            | 6             | 0           | -7.174975               | 0.275781  | 1.079074  |
| 36            | 6             | 0           | -7.858299               | -0.562674 | 0.196265  |
| 37            | 6             | 0           | -7.141753               | -1.293885 | -0.752128 |
| 38            | 6             | 0           | -5.752343               | -1.188414 | -0.816256 |
| 39            | 6             | 0           | 0.365537                | -4.871825 | -0.093764 |
| 40            | 6             | 0           | -0.425678               | -5.606915 | -0.995104 |
| 41            | 6             | 0           | -0.291354               | -6.990477 | -1.103379 |
| 42            | 6             | 0           | 0.639801                | -7.670405 | -0.316629 |
| 43            | 6             | 0           | 1.439499                | -6.954474 | 0.576492  |
| 44            | 6             | 0           | 1.306122                | -5.571508 | 0.683796  |
| 45            | 6             | 0           | 5.021776                | 0.440832  | 0.087086  |
| 46            | 6             | 0           | 5.809390                | -0.554557 | 0.698759  |
| 47            | 6             | 0           | 7.198434                | -0.453558 | 0.727899  |
| 48            | 6             | 0           | 7.832662                | 0.644536  | 0.145410  |
| 49            | 6             | 0           | 7.066030                | 1.642257  | -0.462003 |
| 50            | 6             | 0           | 5.678443                | 1.545521  | -0.491099 |
| 51            | 1             | 0           | 0.776519                | 0.763559  | -0.757233 |
| 52            | 1             | 0           | 2.186502                | 4.529122  | 0.852051  |
| 53            | 1             | 0           | -3.036001               | 4.295037  | -0.843951 |
| 54            | 1             | 0           | -4.808469               | 2.291932  | -0.719659 |
| 55            | 1             | 0           | -4.329955               | -2.960397 | 0.734127  |
| 56            | 1             | 0           | -2.250219               | -4.634214 | 0.761744  |
| 57            | 1             | 0           | 2.624983                | -3.982943 | -1.480481 |
| 58            | 1             | 0           | 4.445759                | -2.005299 | -1.429851 |
| 59            | 1             | 0           | -1.909311               | 5.038341  | 1.376115  |
| 60            | 1             | 0           | -1.995791               | 7.510424  | 1.388637  |
| 61            | 1             | 0           | -0.546573               | 8.818370  | -0.152602 |
| 62            | 1             | 0           | 0.992451                | 7.626283  | -1.701570 |
| 63            | 1             | 0           | 1.071474                | 5.153328  | -1.712155 |
| 64            | 1             | 0           | -5.258395               | 1.026823  | 1.709742  |
| 65            | 1             | 0           | -7.723303               | 0.845142  | 1.824126  |
| 66            | 1             | 0           | -8.940159               | -0.643859 | 0.246089  |

N(24)-Me-N(23)-H-NCTPP

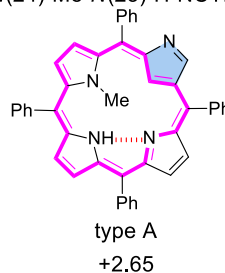

|    |   |   |           |           |           |
|----|---|---|-----------|-----------|-----------|
| 67 | 1 | 0 | -7.664584 | -1.941994 | -1.449696 |
| 68 | 1 | 0 | -5.200803 | -1.745858 | -1.567048 |
| 69 | 1 | 0 | -1.136863 | -5.082010 | -1.624897 |
| 70 | 1 | 0 | -0.907801 | -7.535998 | -1.812087 |
| 71 | 1 | 0 | 0.744834  | -8.747921 | -0.401916 |
| 72 | 1 | 0 | 2.165855  | -7.474139 | 1.194665  |
| 73 | 1 | 0 | 1.927135  | -5.021005 | 1.383601  |
| 74 | 1 | 0 | 5.321400  | -1.399080 | 1.173576  |
| 75 | 1 | 0 | 7.784351  | -1.228391 | 1.213800  |
| 76 | 1 | 0 | 8.915660  | 0.724990  | 0.167256  |
| 77 | 1 | 0 | 7.552767  | 2.498928  | -0.918918 |
| 78 | 1 | 0 | 5.088801  | 2.322250  | -0.960931 |
| 79 | 1 | 0 | 0.354348  | -0.122330 | 1.400272  |
| 80 | 1 | 0 | 1.915136  | -0.401869 | 2.179625  |
| 81 | 1 | 0 | 0.706370  | -1.706496 | 2.135513  |

-----  
Harmonic frequencies (cm<sup>-1</sup>), IR intensities (KM/Mole), Raman scattering activities (A<sup>4</sup>/AMU), depolarization ratios for plane and unpolarized incident light, reduced masses (AMU), force constants (mDyne/A), and normal coordinates:

|                | 1       | 2       | 3       |
|----------------|---------|---------|---------|
|                | A       | A       | A       |
| Frequencies -- | 14.1608 | 28.7921 | 35.7856 |
| Red. masses -- | 6.1256  | 5.6399  | 4.2250  |
| Frc consts --  | 0.0007  | 0.0028  | 0.0032  |
| IR Inten --    | 0.0069  | 0.4041  | 0.3672  |

***N*(24)-Me-*N*(2)-H-NCTPP**

E(RB3LYP) = -1953.05220867 A.U.

Stoichiometry C45H32N4  
 Framework group C1[X(C45H32N4)]  
 Deg. of freedom 237  
 Full point group C1 NOp 1  
 Largest Abelian subgroup C1 NOp 1  
 Largest concise Abelian subgroup C1 NOp 1

Standard orientation:

| Center Number | Atomic Number | Atomic Type | Coordinates (Angstroms) |           |           |
|---------------|---------------|-------------|-------------------------|-----------|-----------|
|               |               |             | X                       | Y         | Z         |
| 1             | 6             | 0           | -0.504084               | -1.206117 | 1.573422  |
| 2             | 7             | 0           | 3.520224                | -1.921911 | 0.683655  |
| 3             | 1             | 0           | 4.006169                | -2.727666 | 1.047273  |
| 4             | 7             | 0           | 0.754209                | 2.017418  | 0.026093  |
| 5             | 7             | 0           | -1.969464               | 0.690340  | -0.069631 |
| 6             | 7             | 0           | -0.792560               | -2.088525 | 0.438007  |
| 7             | 6             | 0           | 2.204170                | -1.953471 | 0.192062  |
| 8             | 6             | 0           | 1.900014                | -0.655517 | -0.191096 |
| 9             | 6             | 0           | 4.014507                | -0.670526 | 0.618413  |
| 10            | 6             | 0           | 3.023377                | 0.173901  | 0.078327  |
| 11            | 6             | 0           | 3.158560                | 1.600564  | -0.098423 |
| 12            | 6             | 0           | 2.047217                | 2.437174  | -0.214314 |
| 13            | 6             | 0           | 2.056901                | 3.840004  | -0.626512 |
| 14            | 6             | 0           | 0.762019                | 4.241787  | -0.615576 |
| 15            | 6             | 0           | -0.030925               | 3.079380  | -0.187914 |
| 16            | 6             | 0           | -1.462315               | 3.115100  | -0.008261 |
| 17            | 6             | 0           | -2.308385               | 2.007712  | 0.133884  |
| 18            | 6             | 0           | -3.717125               | 2.106235  | 0.549355  |
| 19            | 6             | 0           | -4.195637               | 0.841447  | 0.581599  |
| 20            | 6             | 0           | -3.078076               | -0.025930 | 0.180603  |
| 21            | 6             | 0           | -3.179228               | -1.452561 | 0.047357  |
| 22            | 6             | 0           | -2.081764               | -2.324093 | -0.026353 |
| 23            | 6             | 0           | -2.064777               | -3.620214 | -0.657497 |
| 24            | 6             | 0           | -0.795591               | -4.114529 | -0.604354 |
| 25            | 6             | 0           | 0.040546                | -3.143987 | 0.053287  |
| 26            | 6             | 0           | 1.435349                | -3.169909 | 0.135719  |
| 27            | 6             | 0           | 4.528073                | 2.168488  | -0.154109 |
| 28            | 6             | 0           | 4.880319                | 3.293364  | 0.616098  |
| 29            | 6             | 0           | 6.170687                | 3.817350  | 0.568503  |
| 30            | 6             | 0           | 7.139061                | 3.232012  | -0.249677 |
| 31            | 6             | 0           | 6.807413                | 2.114564  | -1.018125 |
| 32            | 6             | 0           | 5.519216                | 1.585027  | -0.967101 |
| 33            | 6             | 0           | -2.086809               | 4.471554  | 0.037939  |
| 34            | 6             | 0           | -1.656204               | 5.432564  | 0.970057  |
| 35            | 6             | 0           | -2.242311               | 6.696301  | 1.018930  |
| 36            | 6             | 0           | -3.265709               | 7.031480  | 0.129874  |
| 37            | 6             | 0           | -3.699337               | 6.091648  | -0.806217 |
| 38            | 6             | 0           | -3.117223               | 4.824825  | -0.850421 |
| 39            | 6             | 0           | -4.531544               | -2.050848 | -0.118153 |
| 40            | 6             | 0           | -5.463065               | -1.505098 | -1.022127 |
| 41            | 6             | 0           | -6.727754               | -2.069150 | -1.177920 |
| 42            | 6             | 0           | -7.093955               | -3.194620 | -0.436614 |
| 43            | 6             | 0           | -6.182938               | -3.750394 | 0.463089  |
| 44            | 6             | 0           | -4.918760               | -3.184452 | 0.621049  |
| 45            | 6             | 0           | 2.141277                | -4.468329 | 0.049021  |
| 46            | 6             | 0           | 1.680477                | -5.591884 | 0.764800  |
| 47            | 6             | 0           | 2.342277                | -6.815308 | 0.686769  |
| 48            | 6             | 0           | 3.489812                | -6.948023 | -0.097745 |
| 49            | 6             | 0           | 3.964856                | -5.844988 | -0.810592 |
| 50            | 6             | 0           | 3.300685                | -4.622044 | -0.740675 |
| 51            | 1             | 0           | 0.967883                | -0.315520 | -0.610656 |
| 52            | 1             | 0           | 5.004011                | -0.432359 | 0.978555  |
| 53            | 1             | 0           | 2.923509                | 4.409979  | -0.929619 |
| 54            | 1             | 0           | 0.371395                | 5.209501  | -0.895447 |
| 55            | 1             | 0           | -4.235124               | 3.013891  | 0.822301  |
| 56            | 1             | 0           | -5.181791               | 0.512538  | 0.877425  |
| 57            | 1             | 0           | -2.912513               | -4.051961 | -1.168054 |
| 58            | 1             | 0           | -0.423273               | -5.012905 | -1.074450 |
| 59            | 1             | 0           | 4.136003                | 3.738255  | 1.267918  |
| 60            | 1             | 0           | 6.422590                | 4.680130  | 1.178433  |
| 61            | 1             | 0           | 8.143852                | 3.642494  | -0.287012 |
| 62            | 1             | 0           | 7.551245                | 1.658207  | -1.665040 |
| 63            | 1             | 0           | 5.260652                | 0.729113  | -1.582200 |
| 64            | 1             | 0           | -0.865527               | 5.174481  | 1.667704  |
| 65            | 1             | 0           | -1.901973               | 7.419135  | 1.755069  |
| 66            | 1             | 0           | -3.719854               | 8.017512  | 0.165730  |

*N*(24)-Me-*N*(2)-H-NCTPP

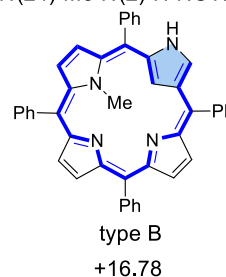

|    |   |   |           |           |           |
|----|---|---|-----------|-----------|-----------|
| 67 | 1 | 0 | -4.489227 | 6.345202  | -1.507592 |
| 68 | 1 | 0 | -3.448692 | 4.099103  | -1.586166 |
| 69 | 1 | 0 | -5.178762 | -0.641528 | -1.614536 |
| 70 | 1 | 0 | -7.425977 | -1.633880 | -1.887299 |
| 71 | 1 | 0 | -8.079945 | -3.633463 | -0.558720 |
| 72 | 1 | 0 | -6.459841 | -4.620820 | 1.051320  |
| 73 | 1 | 0 | -4.222107 | -3.609379 | 1.337027  |
| 74 | 1 | 0 | 0.804746  | -5.488157 | 1.397147  |
| 75 | 1 | 0 | 1.967924  | -7.664493 | 1.251286  |
| 76 | 1 | 0 | 4.008255  | -7.900480 | -0.153460 |
| 77 | 1 | 0 | 4.847769  | -5.940813 | -1.436245 |
| 78 | 1 | 0 | 3.656374  | -3.782338 | -1.329668 |
| 79 | 1 | 0 | -0.222482 | -0.204064 | 1.249572  |
| 80 | 1 | 0 | 0.293898  | -1.657398 | 2.164680  |
| 81 | 1 | 0 | -1.405830 | -1.136504 | 2.185572  |

-----  
Harmonic frequencies (cm<sup>-1</sup>), IR intensities (KM/Mole), Raman scattering activities (A<sup>4</sup>/AMU), depolarization ratios for plane and unpolarized incident light, reduced masses (AMU), force constants (mDyne/A), and normal coordinates:

|                | 1       | 2       | 3       |
|----------------|---------|---------|---------|
|                | A       | A       | A       |
| Frequencies -- | 14.6425 | 28.3874 | 31.9812 |
| Red. masses -- | 6.0709  | 5.6037  | 4.2574  |
| Frc consts --  | 0.0008  | 0.0027  | 0.0026  |
| IR Inten --    | 0.0359  | 0.4457  | 0.6038  |

***N*(2)-Me-*N*(23)-H-NCTPP**

E(RB3LYP) = -1953.07894218 A.U.

Stoichiometry C45H32N4  
 Framework group C1[X(C45H32N4)]  
 Deg. of freedom 237  
 Full point group C1 NOp 1  
 Largest Abelian subgroup C1 NOp 1  
 Largest concise Abelian subgroup C1 NOp 1

Standard orientation:

| Center Number | Atomic Number | Atomic Type | Coordinates (Angstroms) |           |           |
|---------------|---------------|-------------|-------------------------|-----------|-----------|
|               |               |             | X                       | Y         | Z         |
| 1             | 7             | 0           | -3.848501               | -0.684767 | 0.648701  |
| 2             | 7             | 0           | 0.842504                | -1.997941 | -0.057853 |
| 3             | 7             | 0           | 2.077760                | 0.677579  | 0.042839  |
| 4             | 7             | 0           | -0.561619               | 2.002918  | 0.073715  |
| 5             | 6             | 0           | -2.864556               | 0.161365  | 0.069848  |
| 6             | 6             | 0           | -1.803541               | -0.656269 | -0.298160 |
| 7             | 6             | 0           | -3.391353               | -1.951843 | 0.627519  |
| 8             | 6             | 0           | -2.112745               | -1.994510 | 0.040933  |
| 9             | 6             | 0           | -1.309337               | -3.186116 | -0.071572 |
| 10            | 6             | 0           | 0.078462                | -3.145522 | -0.184681 |
| 11            | 6             | 0           | 0.942037                | -4.298784 | -0.432446 |
| 12            | 6             | 0           | 2.214495                | -3.833259 | -0.422240 |
| 13            | 6             | 0           | 2.120314                | -2.393681 | -0.167135 |
| 14            | 6             | 0           | 3.254346                | -1.526642 | -0.053120 |
| 15            | 6             | 0           | 3.196037                | -0.139304 | 0.069146  |
| 16            | 6             | 0           | 4.330765                | 0.740362  | 0.234190  |
| 17            | 6             | 0           | 3.880718                | 2.022392  | 0.277179  |
| 18            | 6             | 0           | 2.442022                | 2.009089  | 0.137899  |
| 19            | 6             | 0           | 1.620036                | 3.135520  | 0.078342  |
| 20            | 6             | 0           | 0.195105                | 3.106588  | -0.038568 |
| 21            | 6             | 0           | -0.622466               | 4.287696  | -0.330359 |
| 22            | 6             | 0           | -1.904410               | 3.854612  | -0.384504 |
| 23            | 6             | 0           | -1.867145               | 2.416660  | -0.111217 |
| 24            | 6             | 0           | -2.990011               | 1.587790  | -0.052052 |
| 25            | 6             | 0           | -2.017120               | -4.492364 | -0.022707 |
| 26            | 6             | 0           | -1.619642               | -5.508568 | 0.866359  |
| 27            | 6             | 0           | -2.300408               | -6.724096 | 0.914568  |
| 28            | 6             | 0           | -3.393532               | -6.953036 | 0.076881  |
| 29            | 6             | 0           | -3.805038               | -5.953235 | -0.806575 |
| 30            | 6             | 0           | -3.129548               | -4.734820 | -0.851157 |
| 31            | 6             | 0           | 4.611563                | -2.159531 | -0.068576 |
| 32            | 6             | 0           | 5.010135                | -3.022948 | 0.965300  |
| 33            | 6             | 0           | 6.270046                | -3.621034 | 0.952732  |
| 34            | 6             | 0           | 7.156951                | -3.369099 | -0.095680 |
| 35            | 6             | 0           | 6.773775                | -2.515887 | -1.131442 |
| 36            | 6             | 0           | 5.512802                | -1.918418 | -1.118129 |
| 37            | 6             | 0           | 2.280857                | 4.478275  | 0.113795  |
| 38            | 6             | 0           | 3.153293                | 4.890422  | -0.907061 |
| 39            | 6             | 0           | 3.757426                | 6.147560  | -0.869724 |
| 40            | 6             | 0           | 3.497722                | 7.020122  | 0.188095  |
| 41            | 6             | 0           | 2.628281                | 6.626880  | 1.207194  |
| 42            | 6             | 0           | 2.025677                | 5.369632  | 1.169275  |
| 43            | 6             | 0           | -4.343597               | 2.192712  | -0.193156 |
| 44            | 6             | 0           | -4.785974               | 3.224879  | 0.652609  |
| 45            | 6             | 0           | -6.056374               | 3.780105  | 0.498763  |
| 46            | 6             | 0           | -6.909763               | 3.317619  | -0.504225 |
| 47            | 6             | 0           | -6.483348               | 2.293774  | -1.354009 |
| 48            | 6             | 0           | -5.216369               | 1.734405  | -1.197091 |
| 49            | 1             | 0           | 1.119785                | 0.339245  | 0.040699  |
| 50            | 1             | 0           | -0.907628               | -0.313374 | -0.779077 |
| 51            | 1             | 0           | -3.961921               | -2.752688 | 1.074532  |
| 52            | 1             | 0           | 0.611444                | -5.309758 | -0.621115 |
| 53            | 1             | 0           | 3.124951                | -4.391263 | -0.585433 |
| 54            | 1             | 0           | 5.352500                | 0.403256  | 0.314529  |
| 55            | 1             | 0           | 4.469646                | 2.917904  | 0.399632  |
| 56            | 1             | 0           | -0.255109               | 5.290922  | -0.490737 |
| 57            | 1             | 0           | -2.785675               | 4.435170  | -0.614060 |
| 58            | 1             | 0           | -0.783640               | -5.326866 | 1.533436  |
| 59            | 1             | 0           | -1.981083               | -7.490800 | 1.614686  |
| 60            | 1             | 0           | -3.922214               | -7.900997 | 0.114582  |
| 61            | 1             | 0           | -4.650590               | -6.123994 | -1.466863 |
| 62            | 1             | 0           | -3.443913               | -3.965956 | -1.549850 |
| 63            | 1             | 0           | 4.325113                | -3.216186 | 1.785344  |
| 64            | 1             | 0           | 6.560736                | -4.280748 | 1.765434  |
| 65            | 1             | 0           | 8.137930                | -3.835233 | -0.105858 |
| 66            | 1             | 0           | 7.453971                | -2.318906 | -1.955294 |

*N*(2)-Me-*N*(23)-H-NCTPP

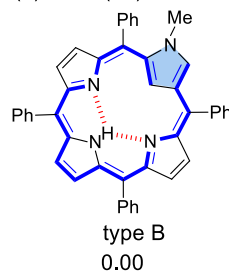

|    |   |   |           |           |           |
|----|---|---|-----------|-----------|-----------|
| 67 | 1 | 0 | 5.212663  | -1.264364 | -1.931298 |
| 68 | 1 | 0 | 3.346566  | 4.220007  | -1.739095 |
| 69 | 1 | 0 | 4.425658  | 6.447463  | -1.672072 |
| 70 | 1 | 0 | 3.967145  | 7.999155  | 0.217194  |
| 71 | 1 | 0 | 2.421947  | 7.297880  | 2.036290  |
| 72 | 1 | 0 | 1.354486  | 5.064239  | 1.966317  |
| 73 | 1 | 0 | -4.128848 | 3.578997  | 1.440538  |
| 74 | 1 | 0 | -6.380931 | 4.572483  | 1.167139  |
| 75 | 1 | 0 | -7.898170 | 3.751227  | -0.624081 |
| 76 | 1 | 0 | -7.136322 | 1.934984  | -2.144561 |
| 77 | 1 | 0 | -4.883212 | 0.945401  | -1.865085 |
| 78 | 6 | 0 | -5.063811 | -0.306360 | 1.365912  |
| 79 | 1 | 0 | -5.863284 | -0.020427 | 0.680542  |
| 80 | 1 | 0 | -5.386590 | -1.161885 | 1.961396  |
| 81 | 1 | 0 | -4.863085 | 0.531791  | 2.034646  |

-----  
Harmonic frequencies (cm<sup>-1</sup>), IR intensities (KM/Mole), Raman scattering activities (A<sup>4</sup>/AMU), depolarization ratios for plane and unpolarized incident light, reduced masses (AMU), force constants (mDyne/A), and normal coordinates:

|                | 1       | 2       | 3       |
|----------------|---------|---------|---------|
|                | A       | A       | A       |
| Frequencies -- | 12.5781 | 26.4228 | 28.9439 |
| Red. masses -- | 6.0642  | 4.1382  | 5.6036  |
| Frc consts --  | 0.0006  | 0.0017  | 0.0028  |
| IR Inten --    | 0.0205  | 0.3310  | 0.4553  |

***N*(2)-Me-*N*(24)-H-NCTPP**

E(RB3LYP) = -1953.06836899 A.U.

Stoichiometry C45H32N4  
 Framework group C1[X(C45H32N4)]  
 Deg. of freedom 237  
 Full point group C1 NOp 1  
 Largest Abelian subgroup C1 NOp 1  
 Largest concise Abelian subgroup C1 NOp 1

Standard orientation:

| Center Number | Atomic Number | Atomic Type | Coordinates (Angstroms) |           |           |
|---------------|---------------|-------------|-------------------------|-----------|-----------|
|               |               |             | X                       | Y         | Z         |
| 1             | 7             | 0           | -3.842464               | -0.697716 | 0.648015  |
| 2             | 7             | 0           | 0.852255                | -1.997548 | -0.058539 |
| 3             | 7             | 0           | 2.079900                | 0.681473  | 0.042153  |
| 4             | 7             | 0           | -0.563237               | 1.999303  | 0.073029  |
| 5             | 1             | 0           | -0.221661               | 1.003868  | 0.266250  |
| 6             | 6             | 0           | -2.860929               | 0.151210  | 0.069162  |
| 7             | 6             | 0           | -1.797593               | -0.663404 | -0.298846 |
| 8             | 6             | 0           | -3.381716               | -1.963487 | 0.626833  |
| 9             | 6             | 0           | -2.102992               | -2.002519 | 0.040247  |
| 10            | 6             | 0           | -1.296199               | -3.191836 | -0.072258 |
| 11            | 6             | 0           | 0.091479                | -3.147297 | -0.185367 |
| 12            | 6             | 0           | 0.958329                | -4.298099 | -0.433132 |
| 13            | 6             | 0           | 2.229459                | -3.828958 | -0.422926 |
| 14            | 6             | 0           | 2.131185                | -2.389654 | -0.167821 |
| 15            | 6             | 0           | 3.262748                | -1.519394 | -0.053806 |
| 16            | 6             | 0           | 3.200495                | -0.132227 | 0.068460  |
| 17            | 6             | 0           | 4.332717                | 0.750661  | 0.233504  |
| 18            | 6             | 0           | 3.879027                | 2.031407  | 0.276493  |
| 19            | 6             | 0           | 2.440375                | 2.014013  | 0.137213  |
| 20            | 6             | 0           | 1.615189                | 3.138103  | 0.077656  |
| 21            | 6             | 0           | 0.190346                | 3.105120  | -0.039254 |
| 22            | 6             | 0           | -0.630579               | 4.283898  | -0.331045 |
| 23            | 6             | 0           | -1.911287               | 3.847172  | -0.385190 |
| 24            | 6             | 0           | -1.869934               | 2.409331  | -0.111903 |
| 25            | 6             | 0           | -2.990439               | 1.577272  | -0.052738 |
| 26            | 6             | 0           | -2.000265               | -4.500091 | -0.023393 |
| 27            | 6             | 0           | -1.599900               | -5.515161 | 0.865673  |
| 28            | 6             | 0           | -2.277207               | -6.732620 | 0.913882  |
| 29            | 6             | 0           | -3.369676               | -6.964666 | 0.076195  |
| 30            | 6             | 0           | -3.784023               | -5.966039 | -0.807261 |
| 31            | 6             | 0           | -3.112000               | -4.745709 | -0.851843 |
| 32            | 6             | 0           | 4.621758                | -2.148422 | -0.069262 |
| 33            | 6             | 0           | 5.022784                | -3.010702 | 0.964614  |
| 34            | 6             | 0           | 6.284390                | -3.605204 | 0.952046  |
| 35            | 6             | 0           | 7.170575                | -3.350748 | -0.096366 |
| 36            | 6             | 0           | 6.784975                | -2.498629 | -1.132128 |
| 37            | 6             | 0           | 5.522308                | -1.904747 | -1.118815 |
| 38            | 6             | 0           | 2.272190                | 4.482731  | 0.113109  |
| 39            | 6             | 0           | 3.143451                | 4.897357  | -0.907747 |
| 40            | 6             | 0           | 3.744007                | 6.156207  | -0.870410 |
| 41            | 6             | 0           | 3.481824                | 7.028027  | 0.187409  |
| 42            | 6             | 0           | 2.613504                | 6.632315  | 1.206508  |
| 43            | 6             | 0           | 2.014477                | 5.373359  | 1.168589  |
| 44            | 6             | 0           | -4.345739               | 2.178344  | -0.193842 |
| 45            | 6             | 0           | -4.791049               | 3.209249  | 0.651923  |
| 46            | 6             | 0           | -6.063022               | 3.760861  | 0.498077  |
| 47            | 6             | 0           | -6.915093               | 3.295950  | -0.504911 |
| 48            | 6             | 0           | -6.485769               | 2.273322  | -1.354695 |
| 49            | 6             | 0           | -5.217205               | 1.717557  | -1.197777 |
| 50            | 1             | 0           | -0.902659               | -0.317964 | -0.779763 |
| 51            | 1             | 0           | -3.950004               | -2.765951 | 1.073846  |
| 52            | 1             | 0           | 0.630612                | -5.310009 | -0.621801 |
| 53            | 1             | 0           | 3.141497                | -4.384371 | -0.586119 |
| 54            | 1             | 0           | 5.355406                | 0.416461  | 0.313843  |
| 55            | 1             | 0           | 4.465407                | 2.928589  | 0.398946  |
| 56            | 1             | 0           | -0.266076               | 5.288165  | -0.491423 |
| 57            | 1             | 0           | -2.794199               | 4.425222  | -0.614746 |
| 58            | 1             | 0           | -0.764418               | -5.331083 | 1.532750  |
| 59            | 1             | 0           | -1.955704               | -7.498413 | 1.614000  |
| 60            | 1             | 0           | -3.895661               | -7.914127 | 0.113896  |
| 61            | 1             | 0           | -4.629086               | -6.139202 | -1.467549 |
| 62            | 1             | 0           | -3.428549               | -3.977742 | -1.550536 |
| 63            | 1             | 0           | 4.338314                | -3.205887 | 1.784658  |
| 64            | 1             | 0           | 6.576954                | -4.264089 | 1.764748  |
| 65            | 1             | 0           | 8.152875                | -3.814091 | -0.106544 |
| 66            | 1             | 0           | 7.464608                | -2.299715 | -1.955980 |

*N*(2)-Me-*N*(24)-H-NCTPP

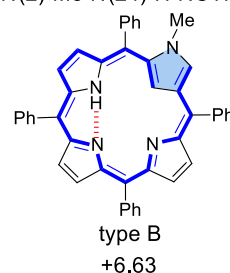

|    |   |   |           |           |           |
|----|---|---|-----------|-----------|-----------|
| 67 | 1 | 0 | 5.220311  | -1.251549 | -1.931984 |
| 68 | 1 | 0 | 3.338629  | 4.227494  | -1.739781 |
| 69 | 1 | 0 | 4.411384  | 6.458009  | -1.672758 |
| 70 | 1 | 0 | 3.948461  | 8.008391  | 0.216508  |
| 71 | 1 | 0 | 2.405263  | 7.302726  | 2.035604  |
| 72 | 1 | 0 | 1.344157  | 5.066059  | 1.965631  |
| 73 | 1 | 0 | -4.134932 | 3.565233  | 1.439852  |
| 74 | 1 | 0 | -6.389831 | 4.552313  | 1.166453  |
| 75 | 1 | 0 | -7.904729 | 3.726746  | -0.624767 |
| 76 | 1 | 0 | -7.137720 | 1.912677  | -2.145247 |
| 77 | 1 | 0 | -4.881806 | 0.929503  | -1.865771 |
| 78 | 6 | 0 | -5.058845 | -0.322766 | 1.365226  |
| 79 | 1 | 0 | -5.859128 | -0.039107 | 0.679856  |
| 80 | 1 | 0 | -5.379190 | -1.179205 | 1.960710  |
| 81 | 1 | 0 | -4.860503 | 0.515952  | 2.033960  |

-----  
Harmonic frequencies (cm<sup>-1</sup>), IR intensities (KM/Mole), Raman scattering activities (A<sup>4</sup>/AMU), depolarization ratios for plane and unpolarized incident light, reduced masses (AMU), force constants (mDyne/A), and normal coordinates:

|                | 1       | 2       | 3       |
|----------------|---------|---------|---------|
|                | A       | A       | A       |
| Frequencies -- | 13.8084 | 29.2319 | 30.5815 |
| Red. masses -- | 6.1089  | 4.2969  | 5.5510  |
| Frc consts --  | 0.0007  | 0.0022  | 0.0031  |
| IR Inten --    | 0.0193  | 0.4479  | 0.8682  |



***N*(2)-Me-*N*(22)-H-NCTPP**

E(RB3LYP) = -1953.06798634 A.U.

Stoichiometry C45H32N4  
 Framework group C1[X(C45H32N4)]  
 Deg. of freedom 237  
 Full point group C1 NOp 1  
 Largest Abelian subgroup C1 NOp 1  
 Largest concise Abelian subgroup C1 NOp 1

Standard orientation:

| Center Number | Atomic Number | Atomic Type | Coordinates (Angstroms) |           |           |
|---------------|---------------|-------------|-------------------------|-----------|-----------|
|               |               |             | X                       | Y         | Z         |
| 1             | 7             | 0           | -3.843756               | -0.696502 | 0.648534  |
| 2             | 7             | 0           | 0.852604                | -1.990396 | -0.058020 |
| 3             | 1             | 0           | 0.493249                | -0.994318 | 0.095579  |
| 4             | 7             | 0           | 2.076859                | 0.690175  | 0.042672  |
| 5             | 7             | 0           | -0.567941               | 2.004662  | 0.073548  |
| 6             | 6             | 0           | -2.863295               | 0.153665  | 0.069681  |
| 7             | 6             | 0           | -1.798930               | -0.659604 | -0.298327 |
| 8             | 6             | 0           | -3.381407               | -1.961690 | 0.627352  |
| 9             | 6             | 0           | -2.102634               | -1.999104 | 0.040766  |
| 10            | 6             | 0           | -1.294339               | -3.187400 | -0.071739 |
| 11            | 6             | 0           | 0.093282                | -3.141106 | -0.184848 |
| 12            | 6             | 0           | 0.961587                | -4.290811 | -0.432613 |
| 13            | 6             | 0           | 2.232122                | -3.820063 | -0.422407 |
| 14            | 6             | 0           | 2.132029                | -2.380884 | -0.167302 |
| 15            | 6             | 0           | 3.262489                | -1.509194 | -0.053287 |
| 16            | 6             | 0           | 3.198482                | -0.122107 | 0.068979  |
| 17            | 6             | 0           | 4.329587                | 0.762212  | 0.234023  |
| 18            | 6             | 0           | 3.874278                | 2.042383  | 0.277012  |
| 19            | 6             | 0           | 2.435649                | 2.023170  | 0.137732  |
| 20            | 6             | 0           | 1.609043                | 3.146215  | 0.078175  |
| 21            | 6             | 0           | 0.184243                | 3.111431  | -0.038735 |
| 22            | 6             | 0           | -0.638173               | 4.289170  | -0.330526 |
| 23            | 6             | 0           | -1.918327               | 3.850824  | -0.384671 |
| 24            | 6             | 0           | -1.875156               | 2.413037  | -0.111384 |
| 25            | 6             | 0           | -2.994608               | 1.579562  | -0.052219 |
| 26            | 6             | 0           | -1.996750               | -4.496544 | -0.022874 |
| 27            | 6             | 0           | -1.595101               | -5.511107 | 0.866192  |
| 28            | 6             | 0           | -2.270869               | -6.729421 | 0.914401  |
| 29            | 6             | 0           | -3.363043               | -6.962849 | 0.076714  |
| 30            | 6             | 0           | -3.778652               | -5.964747 | -0.806742 |
| 31            | 6             | 0           | -3.108173               | -4.743568 | -0.851324 |
| 32            | 6             | 0           | 4.622295                | -2.136503 | -0.068743 |
| 33            | 6             | 0           | 5.024410                | -2.998275 | 0.965133  |
| 34            | 6             | 0           | 6.286767                | -3.591181 | 0.952565  |
| 35            | 6             | 0           | 7.172630                | -3.335605 | -0.095847 |
| 36            | 6             | 0           | 6.785952                | -2.483974 | -1.131609 |
| 37            | 6             | 0           | 5.522536                | -1.891690 | -1.118296 |
| 38            | 6             | 0           | 2.264343                | 4.491673  | 0.113628  |
| 39            | 6             | 0           | 3.135079                | 4.907401  | -0.907228 |
| 40            | 6             | 0           | 3.734043                | 6.167010  | -0.869891 |
| 41            | 6             | 0           | 3.470757                | 7.038497  | 0.187928  |
| 42            | 6             | 0           | 2.602938                | 6.641687  | 1.207027  |
| 43            | 6             | 0           | 2.005504                | 5.381975  | 1.169108  |
| 44            | 6             | 0           | -4.350667               | 2.178919  | -0.193323 |
| 45            | 6             | 0           | -4.797280               | 3.209260  | 0.652442  |
| 46            | 6             | 0           | -6.069950               | 3.759263  | 0.498596  |
| 47            | 6             | 0           | -6.921432               | 3.293276  | -0.504392 |
| 48            | 6             | 0           | -6.490815               | 2.271191  | -1.354176 |
| 49            | 6             | 0           | -5.221549               | 1.717031  | -1.197258 |
| 50            | 1             | 0           | -0.904433               | -0.313032 | -0.779244 |
| 51            | 1             | 0           | -3.948681               | -2.764871 | 1.074365  |
| 52            | 1             | 0           | 0.635149                | -5.303134 | -0.621282 |
| 53            | 1             | 0           | 3.144862                | -4.374323 | -0.585600 |
| 54            | 1             | 0           | 5.352699                | 0.429306  | 0.314362  |
| 55            | 1             | 0           | 4.459523                | 2.940306  | 0.399465  |
| 56            | 1             | 0           | -0.274940               | 5.293897  | -0.490904 |
| 57            | 1             | 0           | -2.801969               | 4.427757  | -0.614227 |
| 58            | 1             | 0           | -0.759853               | -5.325973 | 1.533269  |
| 59            | 1             | 0           | -1.948397               | -7.494807 | 1.614519  |
| 60            | 1             | 0           | -3.887827               | -7.912974 | 0.114415  |
| 61            | 1             | 0           | -4.623496               | -6.138978 | -1.467030 |
| 62            | 1             | 0           | -3.425693               | -3.976001 | -1.550017 |
| 63            | 1             | 0           | 4.340187                | -3.194326 | 1.785177  |
| 64            | 1             | 0           | 6.580164                | -4.249696 | 1.765267  |
| 65            | 1             | 0           | 8.155515                | -3.797706 | -0.106025 |
| 66            | 1             | 0           | 7.465333                | -2.284201 | -1.955461 |

*N*(2)-Me-*N*(22)-H-NCTPP

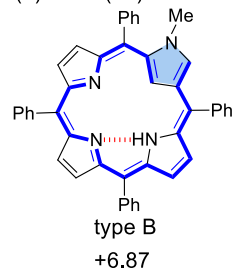

|    |   |   |           |           |           |
|----|---|---|-----------|-----------|-----------|
| 67 | 1 | 0 | 5.219713  | -1.238874 | -1.931465 |
| 68 | 1 | 0 | 3.331104  | 4.237785  | -1.739262 |
| 69 | 1 | 0 | 4.401037  | 6.469655  | -1.672239 |
| 70 | 1 | 0 | 3.936154  | 8.019450  | 0.217027  |
| 71 | 1 | 0 | 2.393850  | 7.311834  | 2.036123  |
| 72 | 1 | 0 | 1.335573  | 5.073827  | 1.966150  |
| 73 | 1 | 0 | -4.141614 | 3.566074  | 1.440371  |
| 74 | 1 | 0 | -6.397759 | 4.550301  | 1.166972  |
| 75 | 1 | 0 | -7.911612 | 3.722820  | -0.624248 |
| 76 | 1 | 0 | -7.142310 | 1.909722  | -2.144728 |
| 77 | 1 | 0 | -4.885154 | 0.929402  | -1.865252 |
| 78 | 6 | 0 | -5.060610 | -0.323090 | 1.365745  |
| 79 | 1 | 0 | -5.861251 | -0.040444 | 0.680375  |
| 80 | 1 | 0 | -5.379872 | -1.179934 | 1.961229  |
| 81 | 1 | 0 | -4.863328 | 0.515878  | 2.034479  |

-----  
Harmonic frequencies (cm<sup>-1</sup>), IR intensities (KM/Mole), Raman scattering activities (A<sup>4</sup>/AMU), depolarization ratios for plane and unpolarized incident light, reduced masses (AMU), force constants (mDyne/A), and normal coordinates:

|                | 1       | 2       | 3       |
|----------------|---------|---------|---------|
|                | A       | A       | A       |
| Frequencies -- | 12.8729 | 26.3484 | 28.6626 |
| Red. masses -- | 6.0947  | 4.0959  | 5.7611  |
| Frc consts --  | 0.0006  | 0.0017  | 0.0028  |
| IR Inten --    | 0.0279  | 0.4483  | 0.6284  |
